# Supplementary material for: DNA 5-methylcytosine detection and methylation phasing using PacBio circular consensus sequencing
Source: PubMed Central journal article supplement (PMC10329642; doi:10.1038/s41467-023-39784-9), 2023-07-08
Supplement: 41467_2023_39784_MOESM1_ESM.pdf [file 41467_2023_39784_MOESM1_ESM.pdf]

**Supplementary Information for**

**DNA 5-methylcytosine detection and methylation phasing using PacBio  
circular consensus sequencing**

*Ni et al.*

## Supplementary Figures

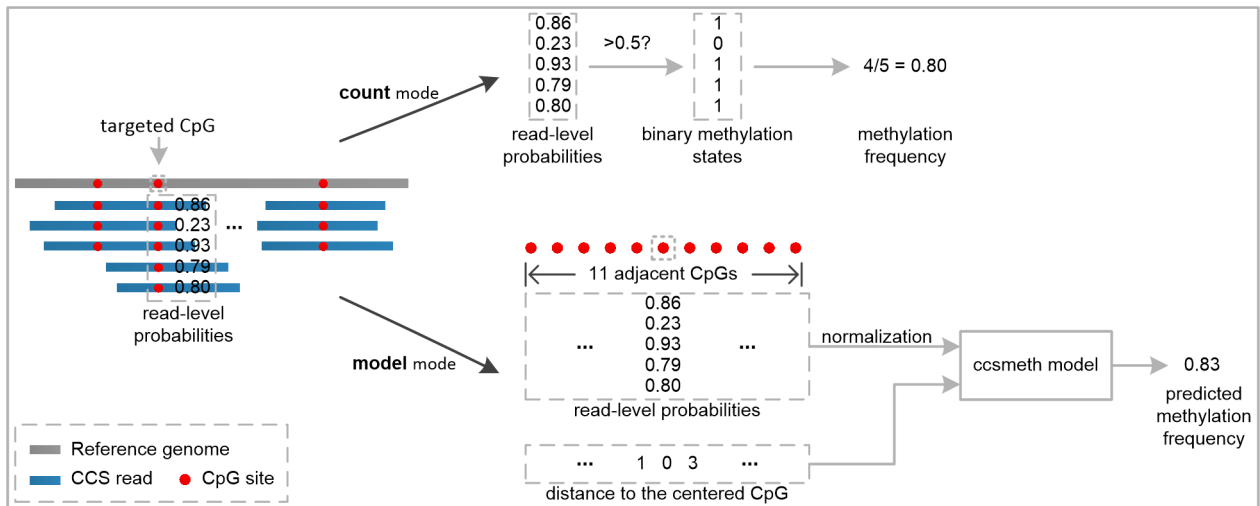

**Supplementary Fig. 1** Illustration of inferring methylation frequency of CpGs at site level using count mode and model mode.

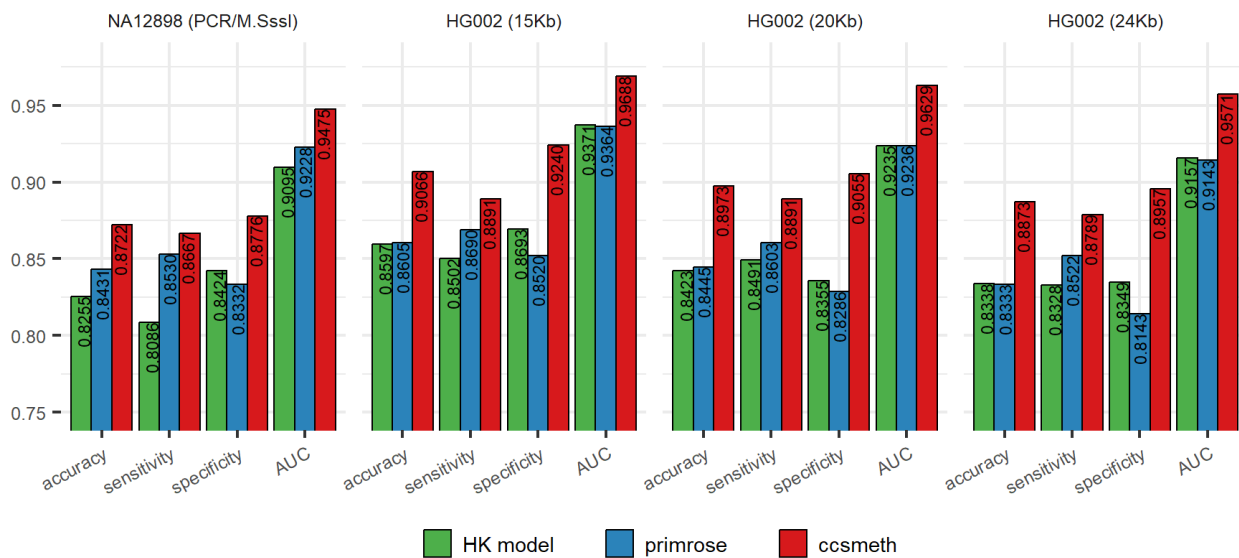

**Supplementary Fig. 2** Comparing ccsmeth with HK model and primrose at read level using subsampled 100K reads of NA12898 (10Kb, PCR/M.SssI-treated), HG002 (15Kb, 20Kb, 24Kb). AUC: Area Under the Curve.

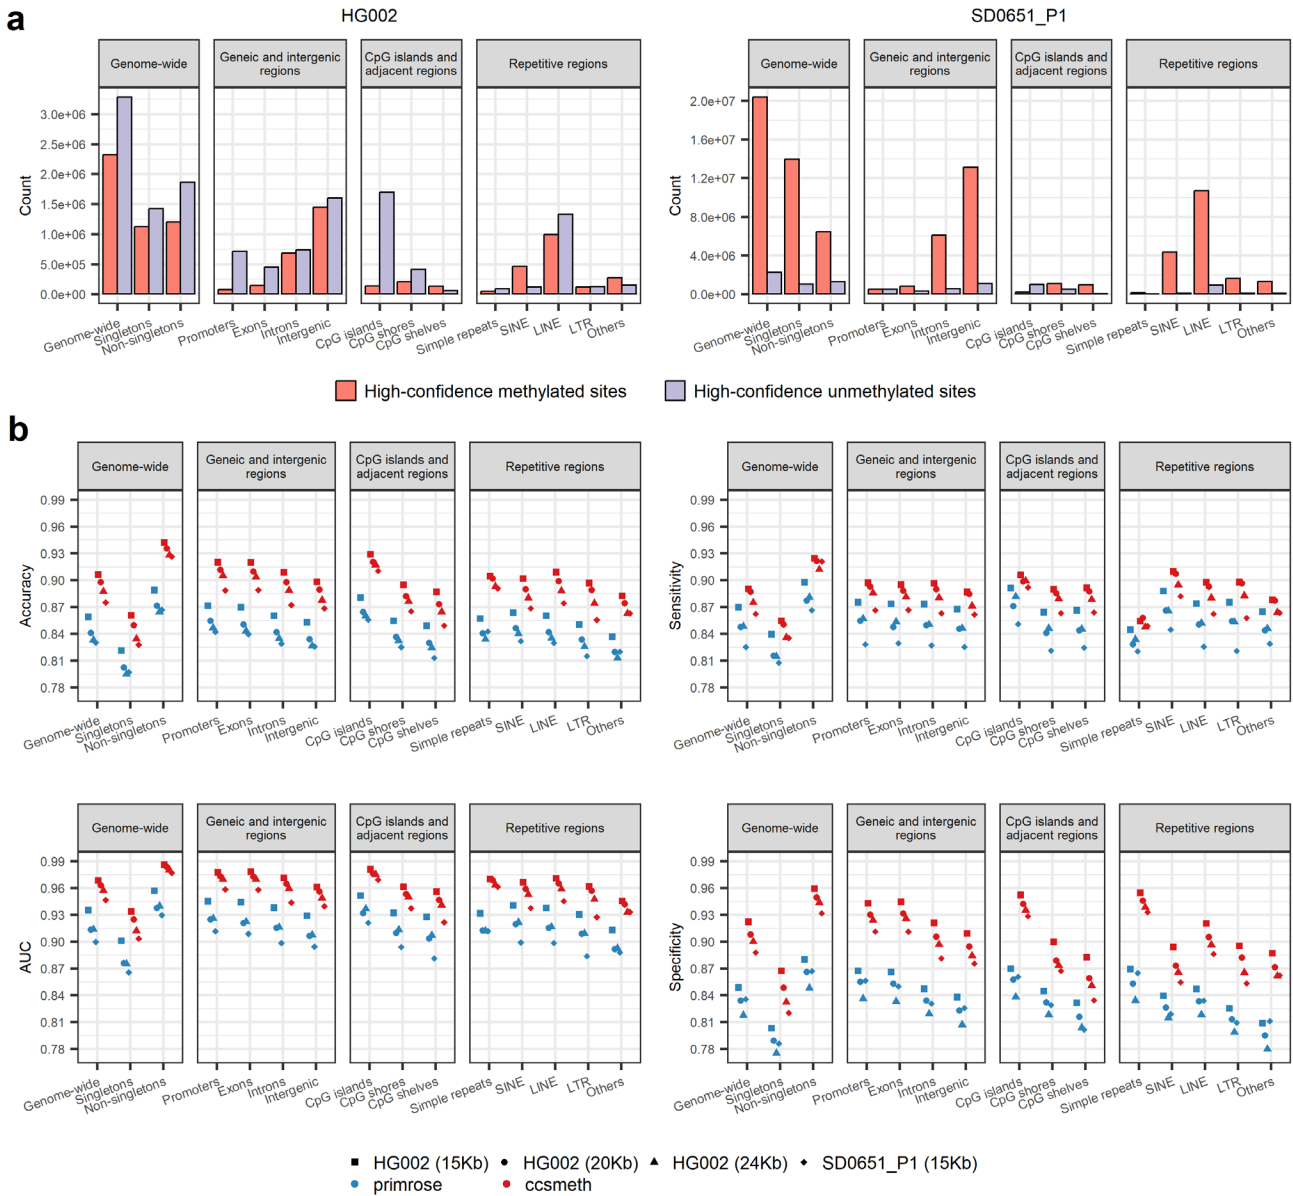

**Supplementary Fig. 3** Read-level evaluation of csmeth in different genomic contexts and regions. **a** Number of high-confidence methylated and unmethylated sites (CpGs) of HG002 and SD0651\_P1 in different genomic contexts and regions. The high-confidence sites are selected based on the results of BS-seq (methylated: coverage  $\geq 5$  and methylation frequency = 1; unmethylated: coverage  $\geq 5$  and methylation frequency = 0). **b** Read-level performances of primrose and csmeth in different genomic contexts and regions. Source data are provided as a Source Data file.

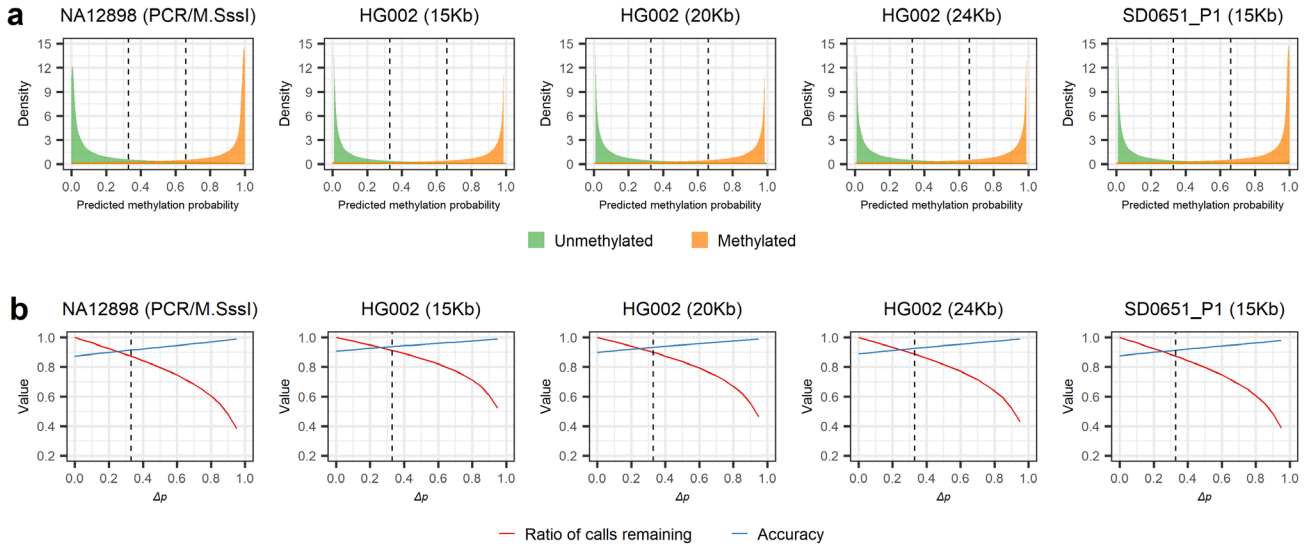

**Supplementary Fig. 4** Filtering out ambiguous calls to improve the accuracy of ccmeth at read level. **a** Distribution of methylation probabilities predicted by ccmeth for the methylated and unmethylated CpGs. Dash lines in the plots indicate probability = 0.33 and 0.66. **b** Effect of  $\Delta_p$  on the percentage of remaining calls and the accuracies of ccmeth for read-level prediction.  $\Delta_p = |P_r - P'_r|$ , where  $P_r$  is methylation probability outputted by ccmeth for a CpG,  $P'_r = 1 - P_r$ . Dash lines indicate  $\Delta_p = 0.33$ . Source data are provided as a Source Data file.

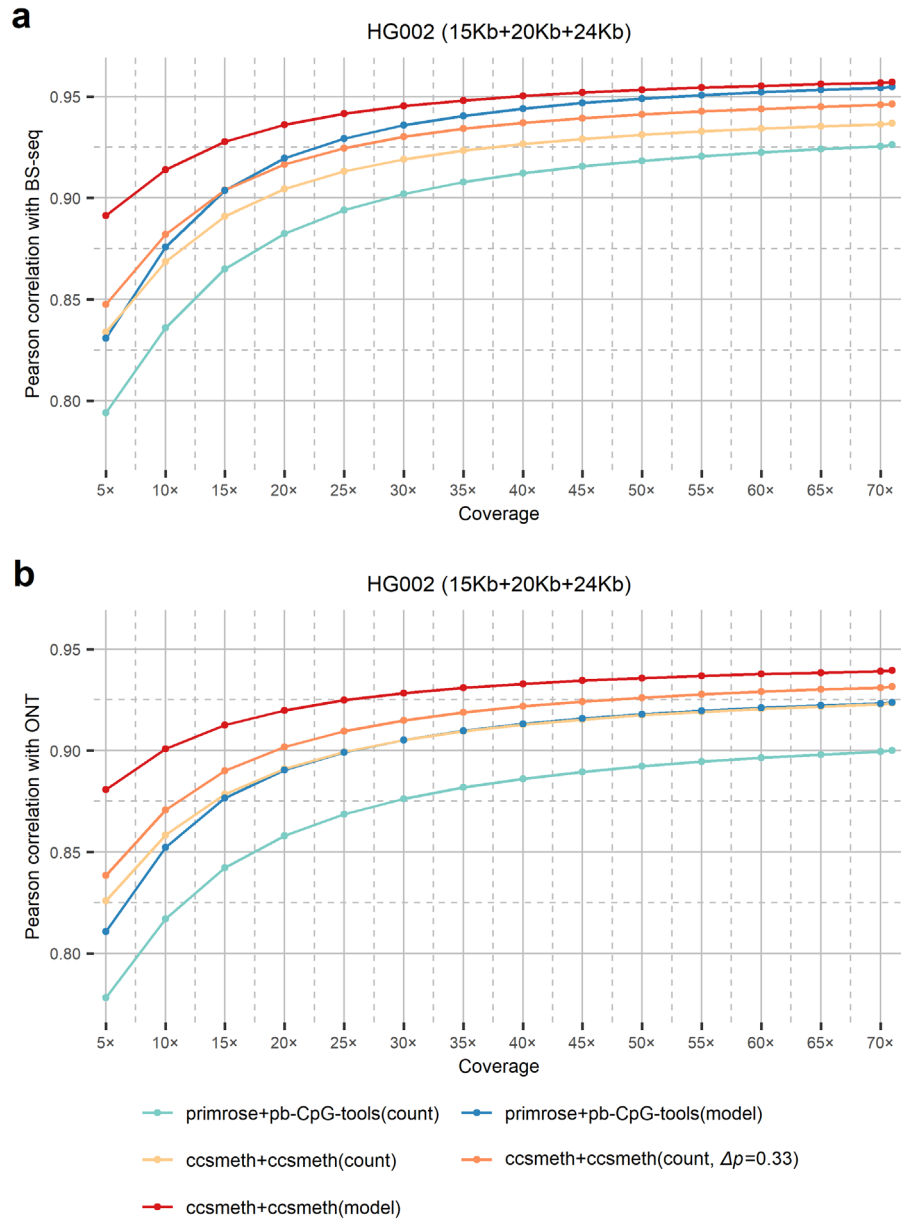

**Supplementary Fig. 5** Comparing csmeth and primrose/pb-CpG-tools against BS-seq (a) and nanopore sequencing (b) under different coverages of HG002 CCS reads (71.0× in total). Values for coverage 5×-70× are the average of 5 repeated tests. The standard deviation values of the multiple repeated tests are in Supplementary Data 1. Source data are provided as a Source Data file.

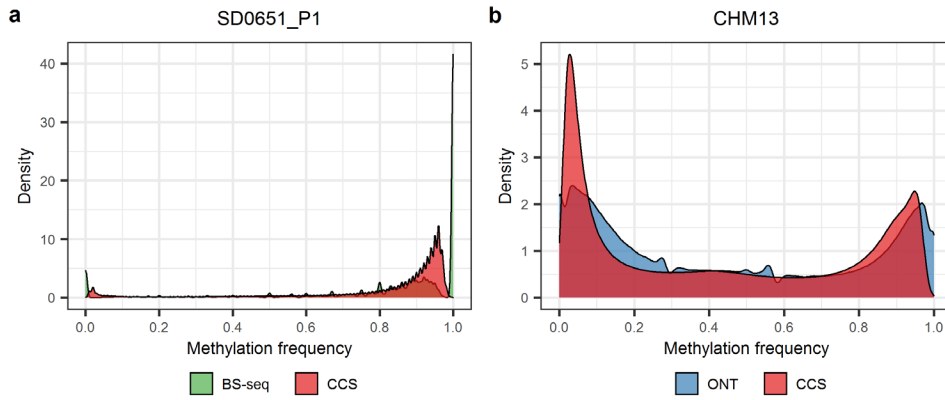

**Supplementary Fig. 6** Methylation frequencies of CpGs in two human samples SD0651\_P1 and CHM13. **a** Distribution of methylation frequencies of CpGs in SD0651\_P1 detected by BS-seq and CCS (ccsmeth in model mode). **b** Distribution of methylation frequencies of CpGs in CHM13 detected by nanopore sequencing and CCS (ccsmeth in model mode). ONT: nanopore sequencing.

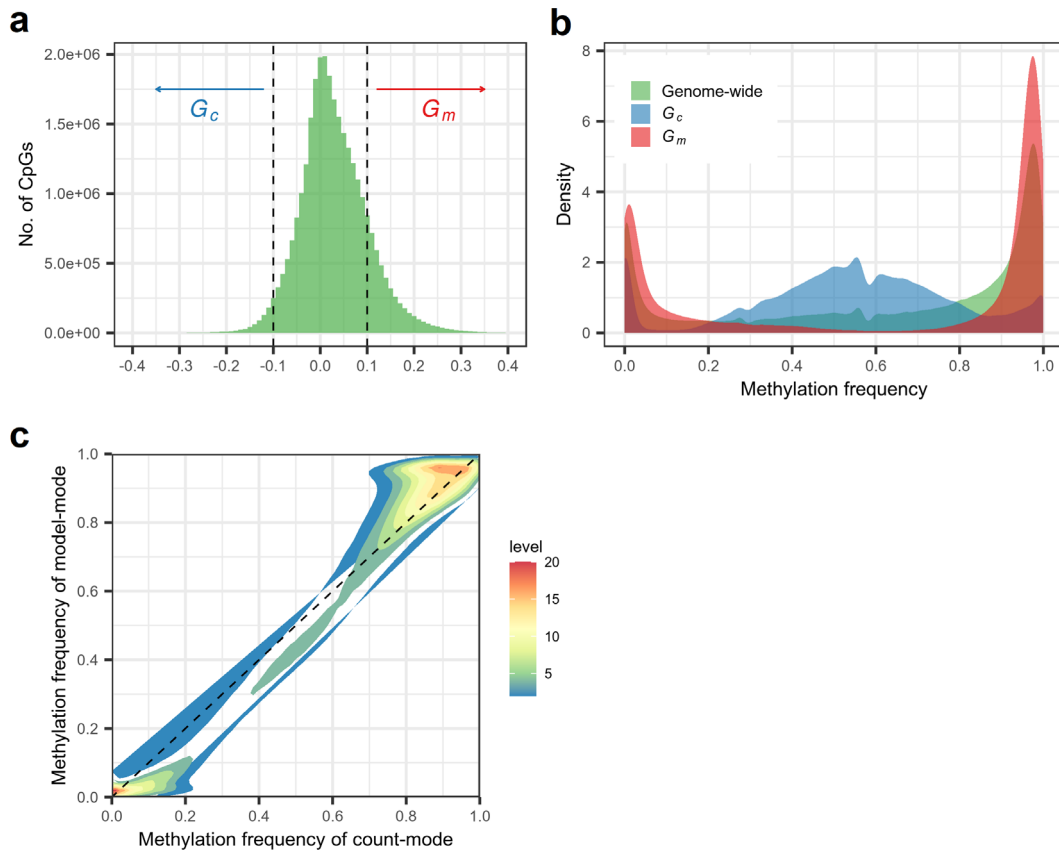

**Supplementary Fig. 7** Comparison of the count mode and model mode of ccsmeth using 71.0× HG002 CCS reads. **a** Distribution of the number of CpGs in terms of measuring whether the methylation frequencies of model mode or count mode is closer to that of BS-seq.  $R_b$ ,  $R_c$ ,  $R_m$  represent the methylation frequencies of a CpG calculated by BS-seq, count mode of ccsmeth, and model mode of ccsmeth, respectively.  $G_c$  contains CpGs whose  $|R_b - R_c| - |R_b - R_m| < -0.1$ , while  $G_m$  contains CpGs whose  $|R_b - R_c| - |R_b - R_m| > 0.1$ . **b** Distribution of the “True” methylation frequencies (calculated by BS-seq) of the CpGs in the whole genome,  $G_c$ , and  $G_m$ , respectively. **c** Comparison of genome-wide per-site methylation frequency between the count mode and model mode of ccsmeth.

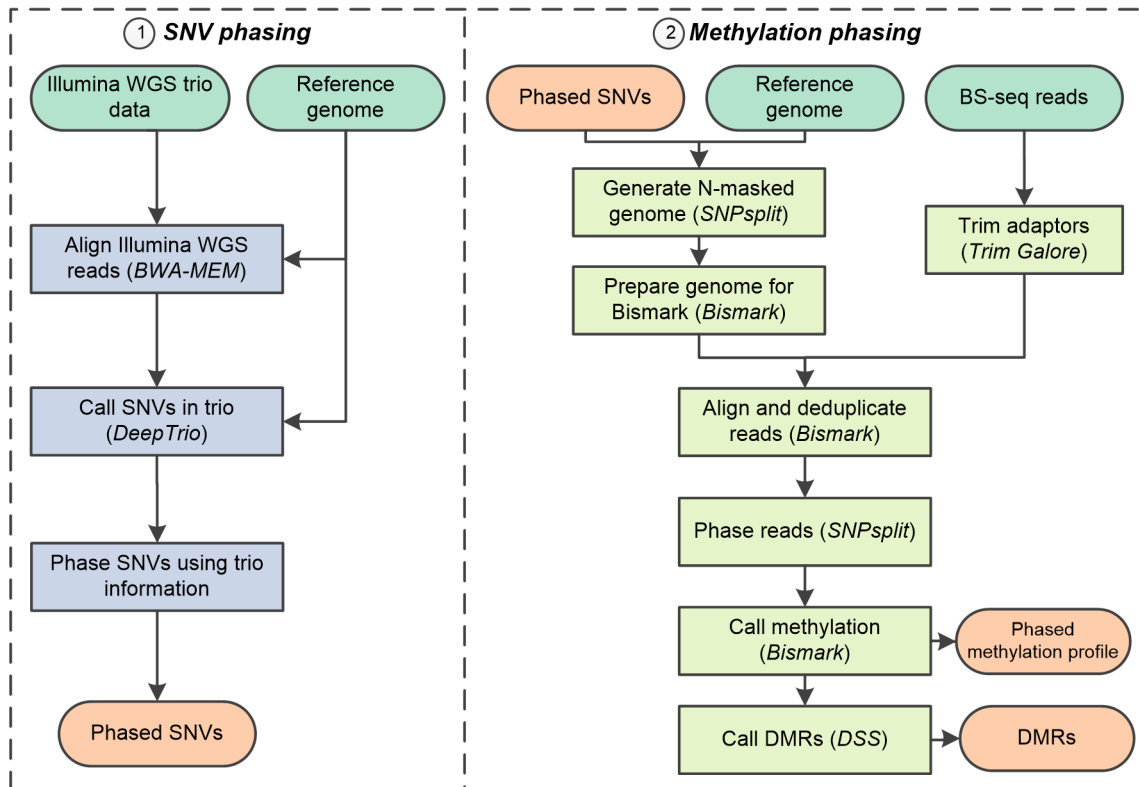

**Supplementary Fig. 8** Pipeline of haplotype-aware methylation calling and allele-specific methylation detection using Illumina whole-genome sequencing (WGS) trio data and BS-seq data. SNVs: single nucleotide variants; DMRs: differentially methylated regions.

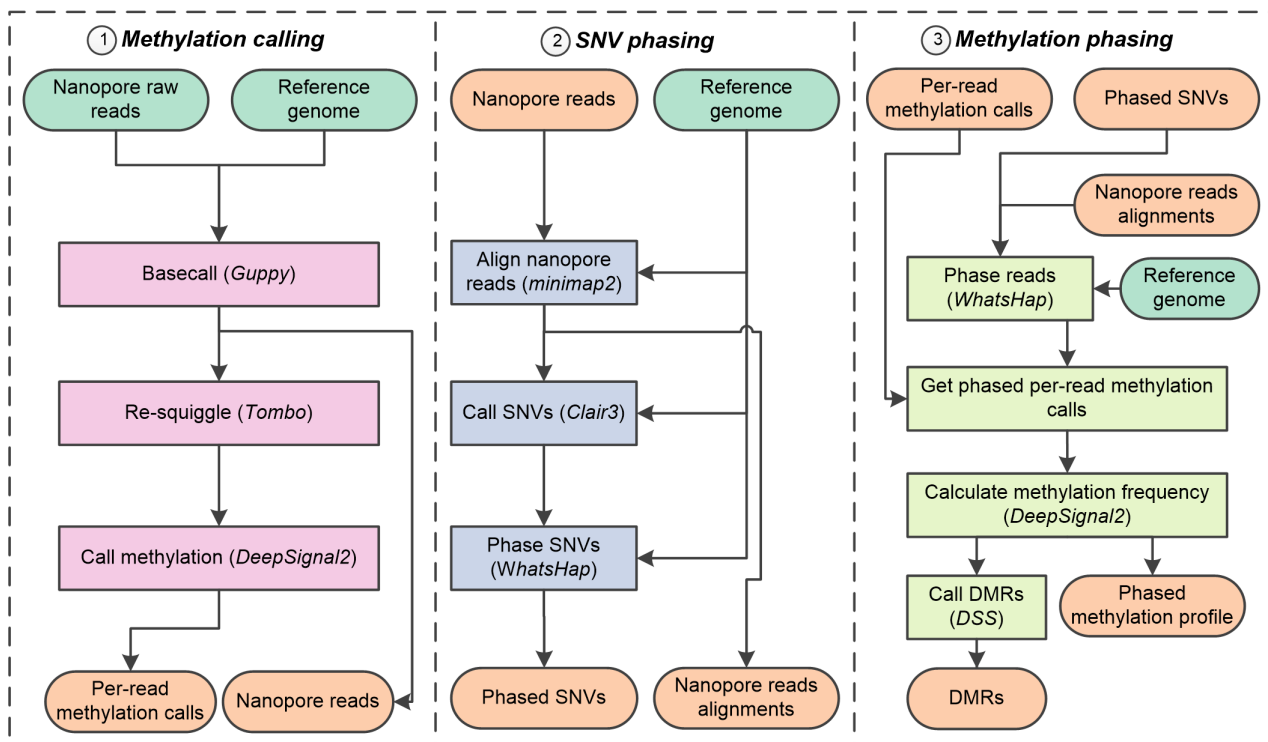

**Supplementary Fig. 9** Pipeline of haplotype-aware methylation calling and allele-specific methylation using nanopore data only. SNVs: single nucleotide variants; DMRs: differentially methylated regions.

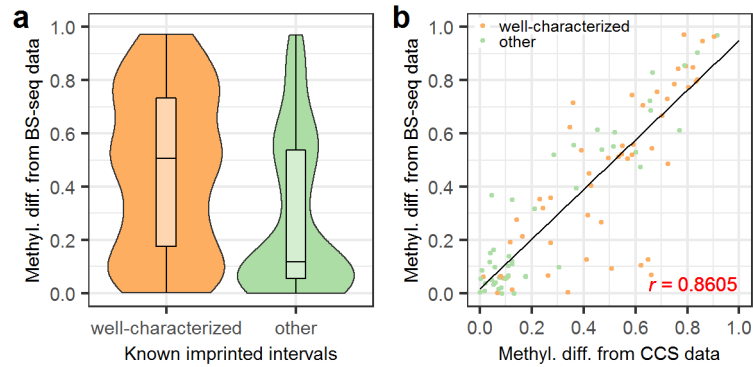

**Supplementary Fig. 10** Methylation differences of known imprinted intervals calculated using BS-seq/CCS data in two haplotypes of HG002. **a** Distribution of methylation differences of known imprinted intervals between two haplotypes of HG002 calculated using BS-seq data. 52 out of 102 well-characterized intervals and 46 out of 102 other intervals which have at least 5 CpGs covered by BS-seq reads in each haplotype are analyzed. The boxes inside the violin plots indicate 50th percentile (middle line), 25th and 75th percentile (box), the smallest value within 1.5 times interquartile range below 25th percentile and largest value within 1.5 times interquartile range above 75th percentile (whiskers). **b** Comparison of methylation differences of known imprinted intervals calculated using CCS and BS-seq data. 97 known imprinted intervals which can be covered by BS-seq and CCS data were analyzed. Methyl. diff.: methylation difference;  $r$ : Pearson correlation. Source data are provided as a Source Data file.

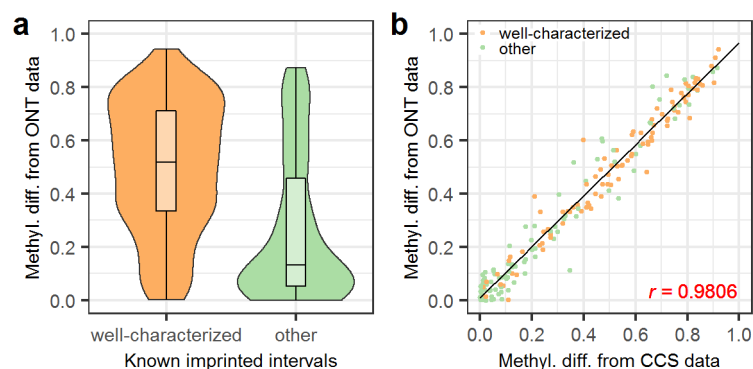

**Supplementary Fig. 11** Methylation differences of known imprinted intervals calculated using nanopore/CCS data in two haplotypes of HG002. **a** Distribution of methylation differences of known imprinted intervals between two haplotypes of HG002 calculated using nanopore data. 98 out of 102 well-characterized intervals and 96 out of 102 other intervals which have at least 5 CpGs covered by nanopore reads in each haplotype are analyzed. The boxes inside the violin plots indicate 50th percentile (middle line), 25th and 75th percentile (box), the smallest value within 1.5 times interquartile range below 25th percentile and largest value within 1.5 times interquartile range above 75th percentile (whiskers). **b** Comparison of methylation differences of known imprinted intervals calculated using CCS and nanopore data. 191 known imprinted intervals which can be covered by nanopore and CCS data were analyzed. Methyl. diff.: methylation difference; ONT: nanopore sequencing;  $r$ : Pearson correlation. Source data are provided as a Source Data file.



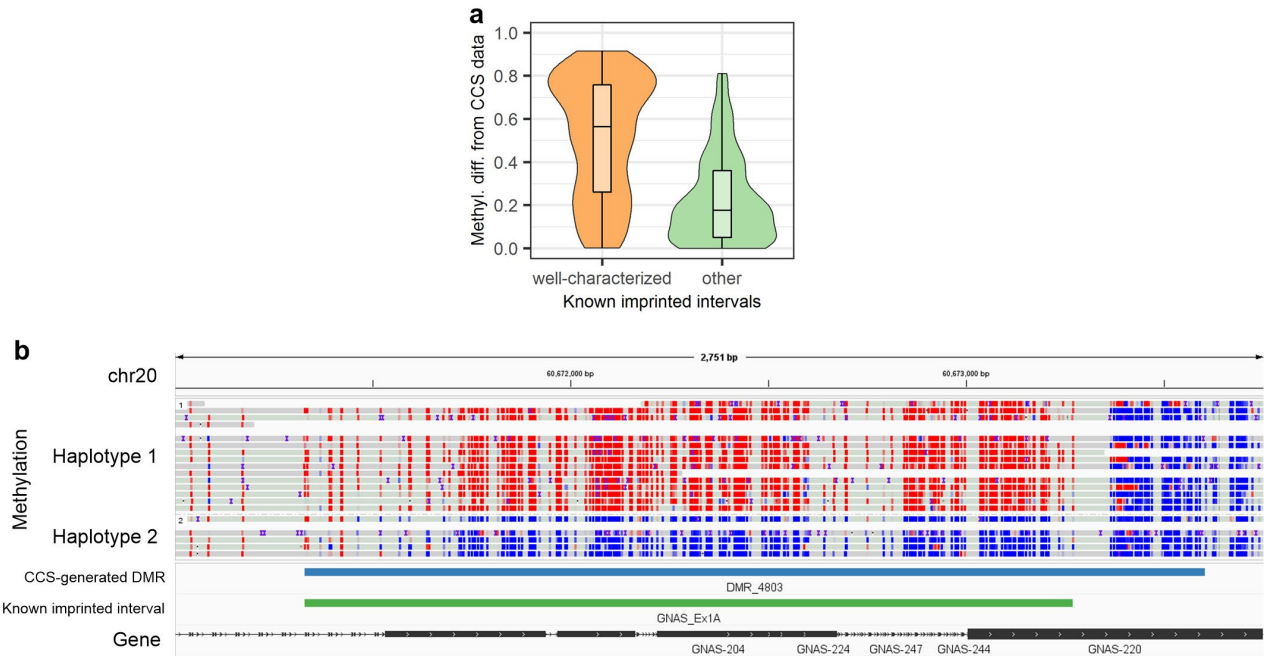

**Supplementary Fig. 12** Methylation phasing of csmethphase on SD0651\_P1 CCS data. **a** Distribution of methylation differences of known imprinted intervals calculated using CCS data between two haplotypes of SD0651\_P1. 93 out of 102 “well-characterized” intervals, and 91 out of 102 “other” intervals which have at least 5 CpGs covered by CCS reads in each haplotype are analyzed. The boxes inside the violin plots indicate 50th percentile (middle line), 25th and 75th percentile (box), the smallest value within 1.5 times interquartile range below 25th percentile and largest value within 1.5 times interquartile range above 75th percentile (whiskers). Source data are provided as a Source Data file. **b** Screenshot of Integrative Genomics Viewer (chr20:60,671,001-60,673,750) on a DMR of SD0651\_P1 near the maternally imprinted gene *GNAS*. Red and blue dots represent CpGs with high and low methylation probabilities, respectively.

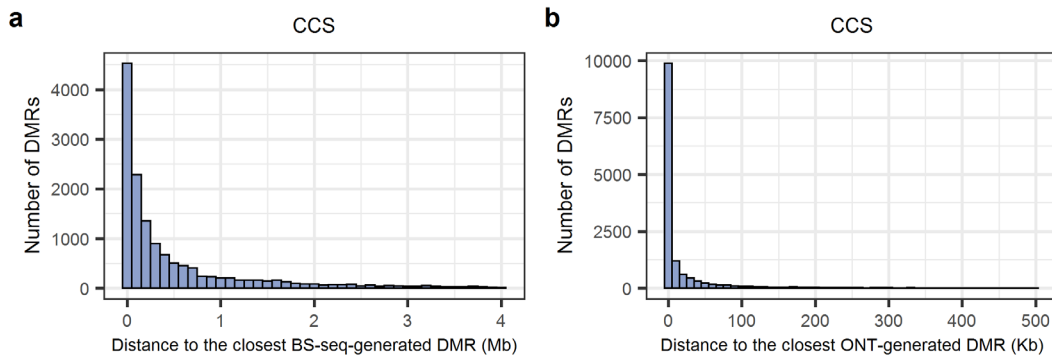

**Supplementary Fig. 13** Distribution of the number of CCS-generated DMRs in terms of distance to the closest BS-seq-generated (a) and ONT-generated DMR (b) in HG002. ONT: nanopore sequencing. Source data are provided as a Source Data file.

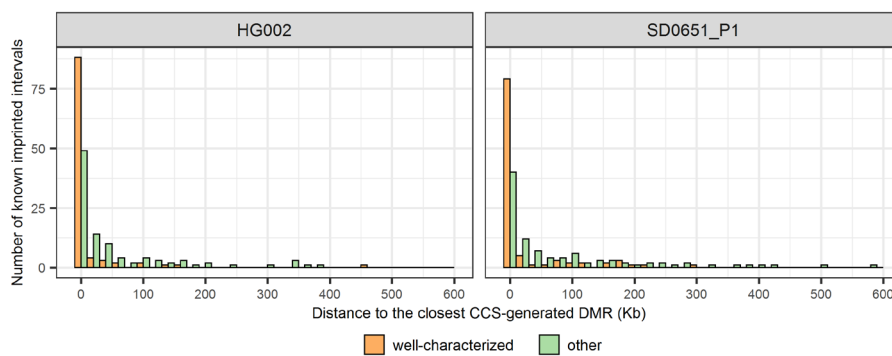

**Supplementary Fig. 14** Distribution of the number of known imprinted intervals in terms of distance to the closest CCS-generated DMR in HG002 and SD0651\_P1. Source data are provided as a Source Data file.

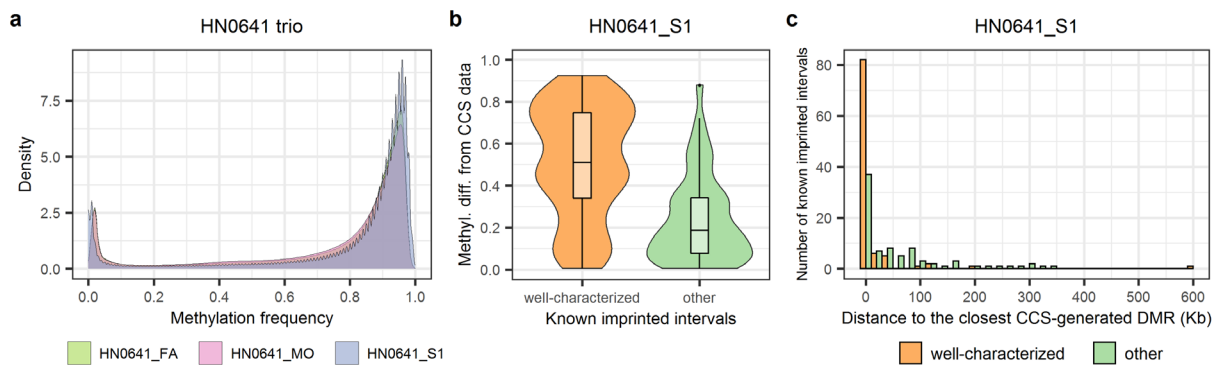

**Supplementary Fig. 15** 5mCpG detection and methylation phasing of the HN0641 family trio using csmethphase. **a** Distribution of methylation frequencies of CpGs in HN0641\_FA (father), HN0641\_MO (mother), and HN0641\_S1 (son). **b** Distribution of methylation differences of known imprinted intervals between two haplotypes of HN0641\_S1. 93 out of 102 “well-characterized” intervals, and 93 out of 102 “other” intervals which have at least 5 CpGs covered by CCS reads in each haplotype are analyzed. The boxes inside the violin plots indicate 50th percentile (middle line), 25th and 75th percentile (box), the smallest value within 1.5 times interquartile range below 25th percentile and largest value within 1.5 times interquartile range above 75th percentile (whiskers). **c** Distribution of the number of known imprinted intervals in terms of distance to the closest CCS-generated DMR in HN0641\_S1. Source data underlying **b** and **c** are provided as a Source Data file.

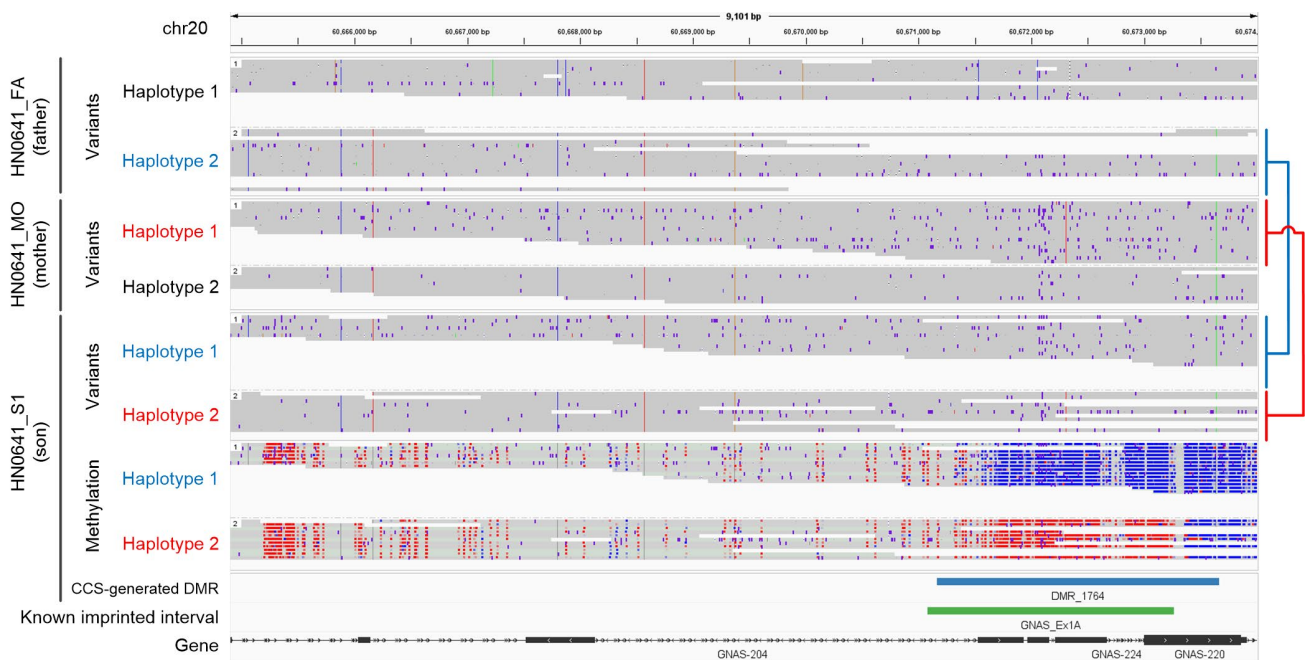

**Supplementary Fig. 16** Screenshot of Integrative Genomics Viewer<sup>1</sup> (chr20:60,664,900-60,673,999) on a DMR of HN0641\_S1 near the **maternally** imprinted gene *GNAS*, showing the variants information of the HN0641 family trio, and the phased methylation information of HN0641\_S1. Red and blue dots in the “Methylation” area represent CpGs with high and low methylation probabilities, respectively.

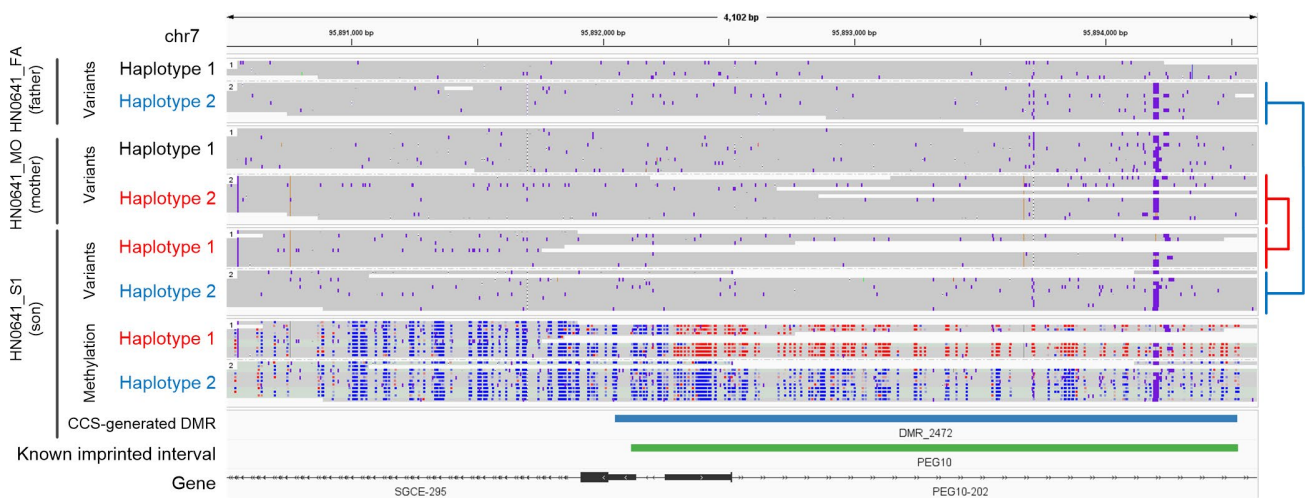

**Supplementary Fig. 17** Screenshot of Integrative Genomics Viewer (chr7:95,890,500-95,894,600) on a DMR of HN0641\_S1 near the **maternally** imprinted gene *PEG10*, showing the variants information of the HN0641 family trio, and the phased methylation information of HN0641\_S1. Red and blue dots in the “Methylation” area represent CpGs with high and low methylation probabilities, respectively.

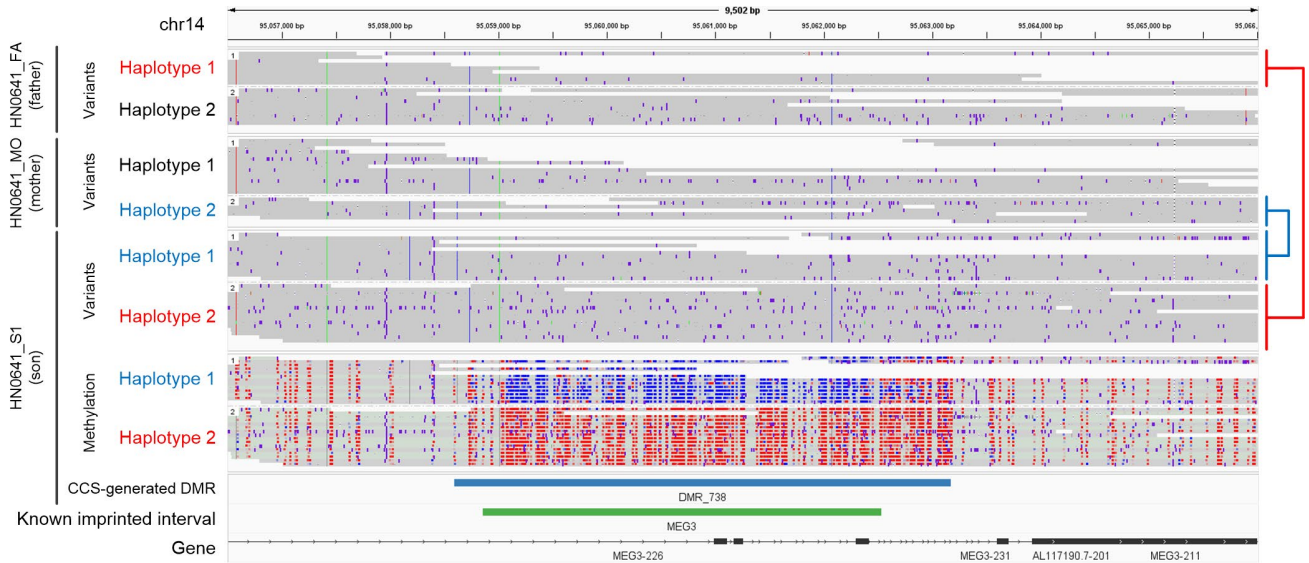

**Supplementary Fig. 18** Screenshot of Integrative Genomics Viewer (chr14:95,056,500-95,066,00) on a DMR of HN0641\_S1 near the **paternally** imprinted gene *MEG3*, showing the variants information of the HN0641 family trio, and the phased methylation information of HN0641\_S1. Red and blue dots in the “Methylation” area represent CpGs with high and low methylation probabilities, respectively.

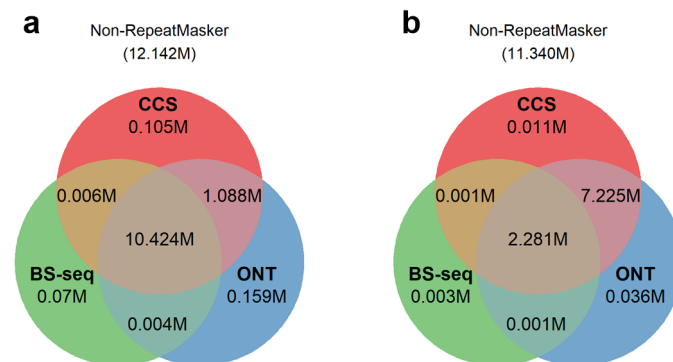

**Supplementary Fig. 19** Comparison of the number of total (a) and phased (b) CpGs detected by the HG002 BS-seq (117.5×), ONT (65.8×), and CCS (71.0×) reads in non-RepeatMasker regions.

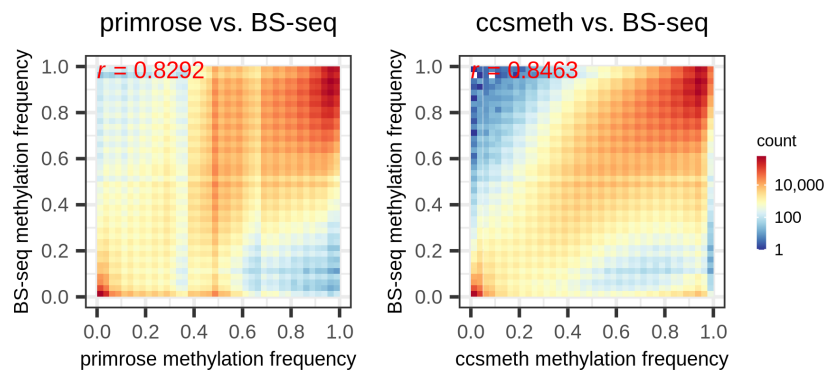

**Supplementary Fig. 20** Comparing ccsmeth and primrose with BS-seq for 5mCpG detection of a Zebrafish sample.

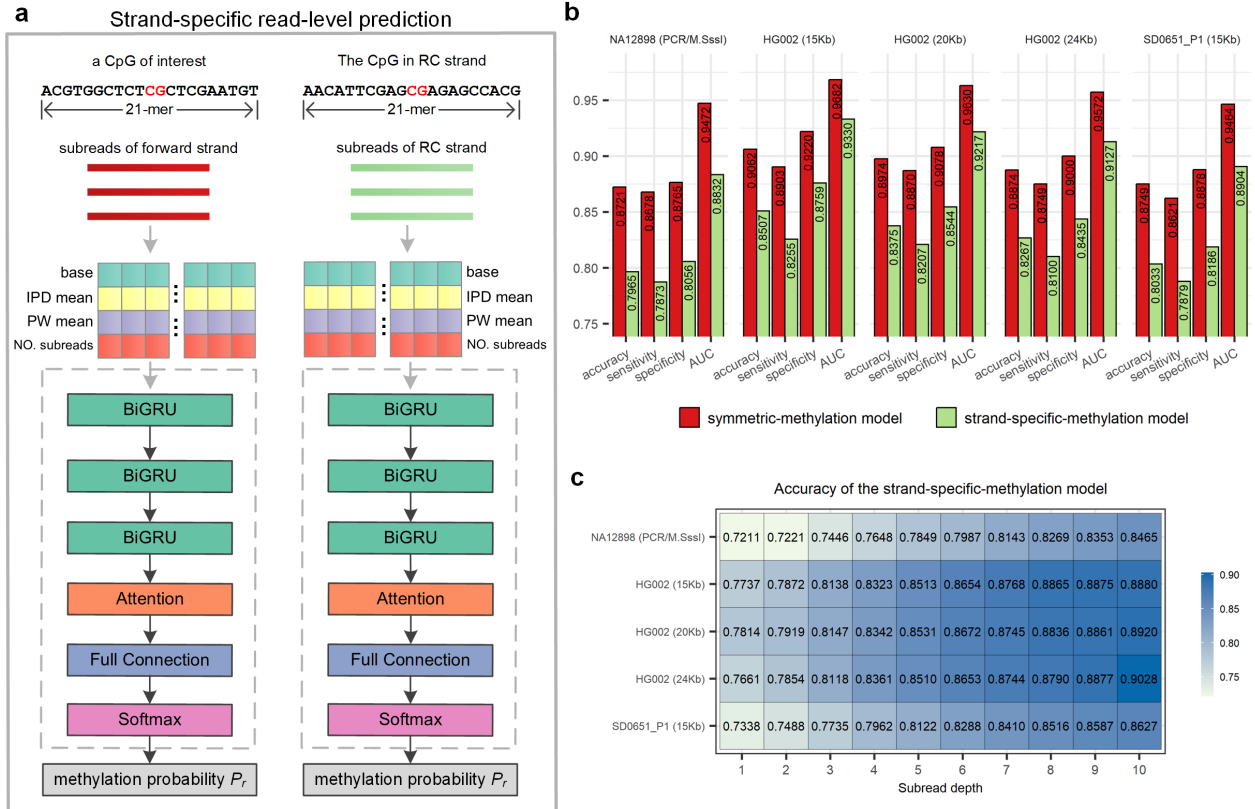

**Supplementary Fig. 21** csmeth for strand-specific methylation detection. **a** The model framework of csmeth for strand-specific methylation detection. **b** Comparison of the strand-specific-methylation model and the symmetric-methylation model of csmeth at read-level 5mCpG detection using long CCS reads. **c** Accuracy of the strand-specific-methylation model under different subread depths.

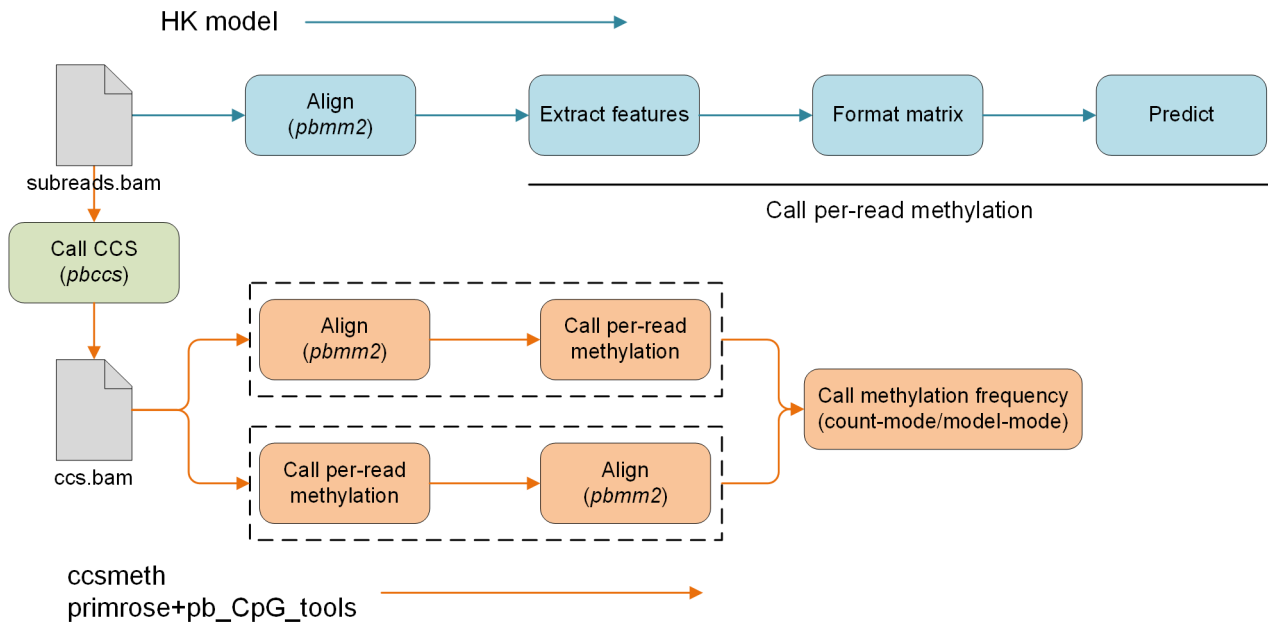

**Supplementary Fig. 22** Main steps of HK model, csmeth, and primrose for methylation calling.

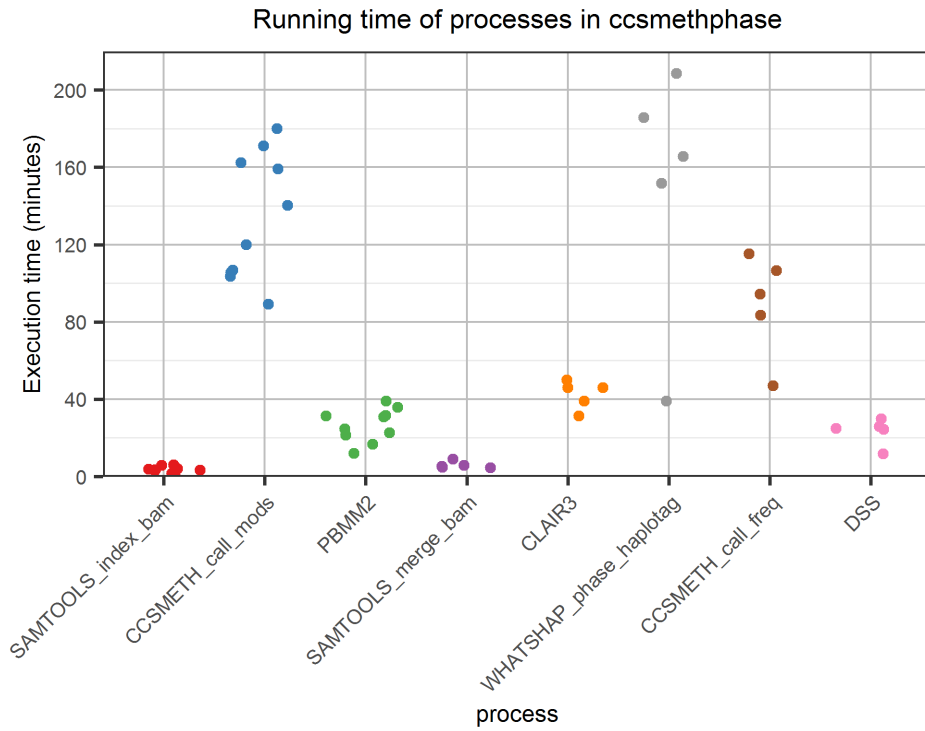

**Supplementary Fig. 23** Runtime of 8 main processes in ccsmethphase. 10 SMRT cells of CCS reads (2 SMRT cells for each of the 5 “samples”: HG002 (15Kb), HG002 (20Kb), HG002 (24Kb), CHM13 (20Kb), and SD0651\_P1 (15Kb)) were used in this test. Source data are provided as a Source Data file.

## Supplementary Tables

**Supplementary Table 1** Statistics of PacBio CCS datasets used in this study. read depth: the number of passed subreads for each CCS read; HPRC: Human Pangenome Reference Consortium.

| sample    | cell ID               | DNA material       | sequencing kit    | insert size | NO. of CCS reads | mean read length | mean read depth | source                          |
|-----------|-----------------------|--------------------|-------------------|-------------|------------------|------------------|-----------------|---------------------------------|
| M01       | m54276_180627_125201  | M.SssI-treated     | sequel I kit 3.0  | -           | 423,470          | 440.54           | 42.44           | Tse. <i>et al.</i> <sup>2</sup> |
| W01       | m54276_180627_023725  | PCR-treated        | sequel I kit 3.0  | -           | 444,310          | 468.12           | 41.66           | Tse. <i>et al.</i> <sup>2</sup> |
| M02       | m64042_190713_204343  | M.SssI-treated     | sequel II kit 1.0 | -           | 1,144,141        | 4,905.04         | 21.86           | Tse. <i>et al.</i> <sup>2</sup> |
| W02       | m64042_190712_093601  | PCR-treated        | sequel II kit 1.0 | -           | 1,476,534        | 6,299.35         | 19.23           | Tse. <i>et al.</i> <sup>2</sup> |
| M03       | m64095_200324_133820  | M.SssI-treated     | sequel II kit 2.0 | -           | 96,933           | 506.72           | 52.85           | Tse. <i>et al.</i> <sup>2</sup> |
| W03       | m64095_200321_184826  | PCR-treated        | sequel II kit 2.0 | -           | 170,347          | 894.64           | 49.41           | Tse. <i>et al.</i> <sup>2</sup> |
| NA12898   | m64173_220705_133926  | PCR/M.SssI-treated | sequel II kit 2.0 | 10Kb        | 2,018,018        | 8,670.84         | 14.12           | in house                        |
| HG002     | m64012_190921_234837  | native             | sequel II kit 2.0 | 15Kb        | 2,389,655        | 12,871.53        | 11.09           | HPRC <sup>3</sup>               |
|           | m64012_190920_173625  | native             | sequel II kit 2.0 | 15Kb        | 2,349,370        | 12,867.23        | 11.05           | HPRC <sup>3</sup>               |
|           | m64015_190920_185703  | native             | sequel II kit 2.0 | 15Kb        | 2,266,781        | 12,875.45        | 10.97           | HPRC <sup>3</sup>               |
|           | m64008_201124_002822  | native             | sequel II kit 2.0 | 15Kb        | 2,689,222        | 15,084.49        | 11.29           | Baid <i>et al.</i> <sup>4</sup> |
|           | m64194_201120_222723  | native             | sequel II kit 2.0 | 15Kb        | 2,606,147        | 15,213.73        | 11.05           | Baid <i>et al.</i> <sup>4</sup> |
|           | m64011_190830_220126  | native             | sequel II kit 2.0 | 20Kb        | 1,472,376        | 18,521.25        | 9.04            | HPRC <sup>3</sup>               |
|           | m64011_190901_095311  | native             | sequel II kit 2.0 | 20Kb        | 1,395,877        | 18,516.36        | 9.00            | HPRC <sup>3</sup>               |
|           | m64014_200920_132517  | native             | sequel II kit 2.0 | 24Kb        | 1,919,428        | 24,160.38        | 7.84            | Baid <i>et al.</i> <sup>4</sup> |
|           | m64179e_200919_061936 | native             | sequel II kit 2.0 | 24Kb        | 1,742,401        | 24,437.28        | 7.60            | Baid <i>et al.</i> <sup>4</sup> |
| SD0651_P1 | m64114_211125_095059  | native             | sequel II kit 2.0 | 15Kb        | 1,641,522        | 15,967.21        | 10.37           | in house                        |
|           | m64242e_211129_171024 | native             | sequel II kit 2.0 | 15Kb        | 2,178,549        | 16,211.05        | 11.07           | in house                        |
| CHM13     | m64062_190803_042216  | native             | sequel II kit 2.0 | 20Kb        | 1,433,166        | 20,760.04        | 7.72            | Nurk <i>et al.</i> <sup>5</sup> |
|           | m64062_190806_063919  | native             | sequel II kit 2.0 | 20Kb        | 1,045,868        | 20,762.52        | 7.80            | Nurk <i>et al.</i> <sup>5</sup> |
| HN0641_FA | m64242e_211230_172120 | native             | sequel II kit 2.0 | 15Kb        | 2,105,955        | 15,010.29        | 10.71           | in house                        |
|           | m64053_220125_054827  | native             | sequel II kit 2.0 | 15Kb        | 2,379,680        | 15,359.23        | 12.14           | in house                        |
| HN0641_MO | m64242e_220101_041819 | native             | sequel II kit 2.0 | 15Kb        | 2,198,341        | 16,179.39        | 10.60           | in house                        |
|           | m64053_220126_152530  | native             | sequel II kit 2.0 | 15Kb        | 2,120,743        | 16,363.45        | 11.16           | in house                        |
| HN0641_S1 | m64242e_220102_151613 | native             | sequel II kit 2.0 | 15Kb        | 1,851,159        | 16,035.47        | 10.15           | in house                        |
|           | m64116_220101_042359  | native             | sequel II kit 2.0 | 15Kb        | 2,254,452        | 16,107.67        | 10.82           | in house                        |

**Supplementary Table 2** Partition of PacBio long ( $\geq 10$ Kb) CCS reads to evaluate ccsmeth. training<sub>1</sub>: Datasets used to train the model of ccsmeth for read-level 5mCpG prediction; training<sub>2</sub>: Datasets used to train ccsmeth for site-level 5mCpG prediction.

| partition             | sample    | cell ID               | insert size         | chromosomes         | evaluation             |
|-----------------------|-----------|-----------------------|---------------------|---------------------|------------------------|
| training <sub>1</sub> | NA12898   | m64173_220705_133926  | 10Kb                | chr1-22             | -                      |
|                       | HG002     | m64012_190921_234837  | 15Kb                | chr1-22, chrX, chrY | -                      |
| training <sub>2</sub> | HG002     | m64012_190920_173625  | 15Kb                | chr1-22, chrX, chrY | -                      |
|                       |           | m64015_190920_185703  | 15Kb                | chr1-22, chrX, chrY | -                      |
| testing               | NA12898   | m64173_220705_133926  | 10Kb                | chrX                | read-level             |
|                       | HG002     | m64008_201124_002822  | 15Kb                | chr1-22, chrX, chrY | read-level, site-level |
|                       |           | m64194_201120_222723  | 15Kb                | chr1-22, chrX, chrY | read-level, site-level |
|                       |           | m64011_190830_220126  | 20Kb                | chr1-22, chrX, chrY | read-level, site-level |
|                       |           | m64011_190901_095311  | 20Kb                | chr1-22, chrX, chrY | read-level, site-level |
|                       |           | m64014_200920_132517  | 24Kb                | chr1-22, chrX, chrY | read-level, site-level |
|                       |           | m64179e_200919_061936 | 24Kb                | chr1-22, chrX, chrY | read-level, site-level |
|                       | SD0651_P1 | m64114_211125_095059  | 15Kb                | chr1-22, chrX, chrY | read-level, site-level |
|                       |           | m64242e_211129_171024 | 15Kb                | chr1-22, chrX, chrY | read-level, site-level |
|                       | CHM13     | m64062_190803_042216  | 20Kb                | chr1-22, chrX       | site-level             |
|                       |           | m64062_190806_063919  | 20Kb                | chr1-22, chrX       | site-level             |
|                       | HN0641_FA | m64242e_211230_172120 | 15Kb                | chr1-22, chrX, chrY | ASM detection          |
|                       |           | m64053_220125_054827  | 15Kb                | chr1-22, chrX, chrY | ASM detection          |
|                       | HN0641_MO | m64242e_220101_041819 | 15Kb                | chr1-22, chrX, chrY | ASM detection          |
|                       |           | m64053_220126_152530  | 15Kb                | chr1-22, chrX, chrY | ASM detection          |
|                       | HN0641_S1 | m64242e_220102_151613 | 15Kb                | chr1-22, chrX, chrY | ASM detection          |
| m64116_220101_042359  |           | 15Kb                  | chr1-22, chrX, chrY | ASM detection       |                        |

**Supplementary Table 3** Illumina and nanopore datasets used in this study. ONT: Oxford Nanopore Technologies; GIAB: Genome in a Bottle.

| sample    | type            | (mean)<br>read length | mean<br>genome coverage | source                          |
|-----------|-----------------|-----------------------|-------------------------|---------------------------------|
| HG002     | Illumina BS-seq | 2×150                 | 117.5×                  | ONT <sup>6</sup>                |
|           | ONT R9.4.1      | 21,933                | 65.8×                   | ONT <sup>6</sup>                |
|           | Illumina WGS    | 2×250                 | 63.1×                   | GIAB <sup>7</sup>               |
| HG003     | Illumina WGS    | 2×250                 | 55.7×                   | GIAB <sup>7</sup>               |
| HG004     | Illumina WGS    | 2×250                 | 67.9×                   | GIAB <sup>7</sup>               |
| SD0651_P1 | Illumina BS-seq | 2×150                 | 15.7×                   | in house                        |
| CHM13     | ONT R9.4.1      | 19,891                | 41.8×                   | Nurk <i>et al.</i> <sup>5</sup> |



**Supplementary Table 4** Evaluation of ccsmeth on 5mCpG detection at read level. Values in the table are the average and standard deviation of 5 repeated tests in “average±std” format.

| dataset              | method   | accuracy      | sensitivity   | specificity   | AUC           |
|----------------------|----------|---------------|---------------|---------------|---------------|
| M01&W01              | HK model | 0.8696±0.0006 | 0.8443±0.0008 | 0.8950±0.0007 | 0.9440±0.0003 |
|                      | ccsmeth  | 0.9232±0.0004 | 0.9326±0.0005 | 0.9137±0.0005 | 0.9767±0.0001 |
| M02&W02              | HK model | 0.8346±0.0009 | 0.8152±0.0009 | 0.8541±0.0012 | 0.9156±0.0005 |
|                      | ccsmeth  | 0.8788±0.0005 | 0.8744±0.0005 | 0.8833±0.0008 | 0.9496±0.0003 |
| M03&W03              | HK model | 0.8395±0.0011 | 0.7839±0.0013 | 0.8951±0.0012 | 0.9202±0.0007 |
|                      | ccsmeth  | 0.8765±0.0005 | 0.8541±0.0008 | 0.8988±0.0011 | 0.9465±0.0003 |
| NA12898 (pcr/M.Sssl) | primrose | 0.8432±0.0005 | 0.8530±0.0008 | 0.8333±0.0006 | 0.9230±0.0002 |
|                      | ccsmeth  | 0.8721±0.0004 | 0.8678±0.0004 | 0.8765±0.0007 | 0.9472±0.0003 |
| HG002 (15kb)         | primrose | 0.8590±0.0002 | 0.8695±0.0007 | 0.8485±0.0007 | 0.9350±0.0003 |
|                      | ccsmeth  | 0.9062±0.0006 | 0.8903±0.0013 | 0.9220±0.0007 | 0.9682±0.0002 |
| HG002 (20kb)         | primrose | 0.8408±0.0005 | 0.8476±0.0013 | 0.8340±0.0013 | 0.9131±0.0006 |
|                      | ccsmeth  | 0.8974±0.0004 | 0.8870±0.0004 | 0.9078±0.0006 | 0.9630±0.0004 |
| HG002 (24kb)         | primrose | 0.8330±0.0007 | 0.8483±0.0008 | 0.8177±0.0010 | 0.9137±0.0008 |
|                      | ccsmeth  | 0.8874±0.0005 | 0.8749±0.0007 | 0.9000±0.0007 | 0.9572±0.0002 |
| SD0651_P1 (15Kb)     | primrose | 0.8304±0.0007 | 0.8251±0.0006 | 0.8357±0.0013 | 0.8998±0.0004 |
|                      | ccsmeth  | 0.8749±0.0003 | 0.8621±0.0005 | 0.8878±0.0006 | 0.9464±0.0003 |

**Supplementary Table 5** Evaluation of ccsmeth and primrose at genome-wide site level against **BS-seq** on **HG002 (15Kb)** dataset. We compared CpGs covered by at least 5 reads in both CCS and BS-seq datasets. For coverage  $5 \times -25 \times$ , we subsampled corresponding coverage reads from the total reads, and repeated the subsampling 5 times. Values in the table for coverage  $5 \times -25 \times$  are the average and standard deviation of 5 repeated tests in “average $\pm$ std” format.  $r$ : Pearson correlation;  $r^2$ : the coefficient of determination;  $\rho$ : Spearman correlation; RMSE: root mean square error.

| coverage            | method             |                                   | $r$                 | $r^2$               | $\rho$              | RMSE                |
|---------------------|--------------------|-----------------------------------|---------------------|---------------------|---------------------|---------------------|
|                     | read-level calling | site-level calling                |                     |                     |                     |                     |
| 5 $\times$          | primrose           | pb-CpG-tools (count)              | 0.8145 $\pm$ 0.0002 | 0.6635 $\pm$ 0.0003 | 0.7454 $\pm$ 0.0004 | 0.2058 $\pm$ 0.0001 |
|                     | ccsmeth            | ccsmeth (count)                   | 0.8478 $\pm$ 0.0002 | 0.7187 $\pm$ 0.0003 | 0.7741 $\pm$ 0.0003 | 0.1907 $\pm$ 0.0001 |
|                     | ccsmeth            | ccsmeth (count, $\Delta_p=0.33$ ) | 0.8605 $\pm$ 0.0002 | 0.7404 $\pm$ 0.0003 | 0.7851 $\pm$ 0.0003 | 0.1866 $\pm$ 0.0001 |
|                     | primrose           | pb-CpG-tools (model)              | 0.8449 $\pm$ 0.0001 | 0.7139 $\pm$ 0.0002 | 0.7785 $\pm$ 0.0003 | 0.21 $\pm$ 0.0001   |
|                     | primrose           | ccsmeth (model)                   | 0.8784 $\pm$ 0.0002 | 0.7715 $\pm$ 0.0003 | 0.8314 $\pm$ 0.0002 | 0.1694 $\pm$ 0.0001 |
|                     | ccsmeth            | ccsmeth (model)                   | 0.8993 $\pm$ 0.0001 | 0.8088 $\pm$ 0.0002 | 0.851 $\pm$ 0.0002  | 0.1579 $\pm$ 0.0001 |
| 10 $\times$         | primrose           | pb-CpG-tools (count)              | 0.853 $\pm$ 0.0001  | 0.7277 $\pm$ 0.0001 | 0.7821 $\pm$ 0.0001 | 0.1854 $\pm$        |
|                     | ccsmeth            | ccsmeth (count)                   | 0.8798 $\pm$ 0.0001 | 0.7741 $\pm$ 0.0001 | 0.805 $\pm$ 0.0001  | 0.1702 $\pm$        |
|                     | ccsmeth            | ccsmeth (count, $\Delta_p=0.33$ ) | 0.8919 $\pm$ 0.0001 | 0.7956 $\pm$ 0.0001 | 0.8145 $\pm$ 0.0001 | 0.1628 $\pm$        |
|                     | primrose           | pb-CpG-tools (model)              | 0.8864 $\pm$ 0.0001 | 0.7857 $\pm$ 0.0001 | 0.8192 $\pm$ 0.0001 | 0.1781 $\pm$        |
|                     | primrose           | ccsmeth (model)                   | 0.9023 $\pm$ 0.0001 | 0.8142 $\pm$ 0.0001 | 0.8554 $\pm$ 0.0001 | 0.1542 $\pm$        |
|                     | ccsmeth            | ccsmeth (model)                   | 0.9198 $\pm$ 0.0001 | 0.8459 $\pm$ 0.0001 | 0.872 $\pm$         | 0.1433 $\pm$ 0.0001 |
| 15 $\times$         | primrose           | pb-CpG-tools (count)              | 0.8793 $\pm$        | 0.7732 $\pm$ 0.0001 | 0.8083 $\pm$        | 0.171 $\pm$         |
|                     | ccsmeth            | ccsmeth (count)                   | 0.9008 $\pm$        | 0.8114 $\pm$ 0.0001 | 0.827 $\pm$         | 0.1559 $\pm$        |
|                     | ccsmeth            | ccsmeth (count, $\Delta_p=0.33$ ) | 0.9121 $\pm$        | 0.8319 $\pm$ 0.0001 | 0.836 $\pm$         | 0.1463 $\pm$        |
|                     | primrose           | pb-CpG-tools (model)              | 0.9122 $\pm$        | 0.8321 $\pm$        | 0.8462 $\pm$        | 0.1542 $\pm$        |
|                     | primrose           | ccsmeth (model)                   | 0.9176 $\pm$ 0.0001 | 0.8419 $\pm$ 0.0001 | 0.872 $\pm$         | 0.1429 $\pm$        |
|                     | ccsmeth            | ccsmeth (model)                   | 0.9326 $\pm$ 0.0001 | 0.8697 $\pm$ 0.0001 | 0.8866 $\pm$        | 0.1327 $\pm$ 0.0001 |
| 20 $\times$         | primrose           | pb-CpG-tools (count)              | 0.8953 $\pm$        | 0.8015 $\pm$        | 0.8249 $\pm$        | 0.1622 $\pm$        |
|                     | ccsmeth            | ccsmeth (count)                   | 0.9133 $\pm$        | 0.8341 $\pm$        | 0.841 $\pm$         | 0.1472 $\pm$        |
|                     | ccsmeth            | ccsmeth (count, $\Delta_p=0.33$ ) | 0.9238 $\pm$        | 0.8534 $\pm$        | 0.8499 $\pm$        | 0.1362 $\pm$        |
|                     | primrose           | pb-CpG-tools (model)              | 0.9265 $\pm$        | 0.8585 $\pm$        | 0.8624 $\pm$        | 0.1394 $\pm$        |
|                     | primrose           | ccsmeth (model)                   | 0.9269 $\pm$        | 0.8591 $\pm$        | 0.8827 $\pm$        | 0.1353 $\pm$        |
|                     | ccsmeth            | ccsmeth (model)                   | 0.9403 $\pm$        | 0.8841 $\pm$        | 0.896 $\pm$         | 0.1258 $\pm$        |
| 25 $\times$         | primrose           | pb-CpG-tools (count)              | 0.9056 $\pm$        | 0.8202 $\pm$        | 0.836 $\pm$         | 0.1565 $\pm$        |
|                     | ccsmeth            | ccsmeth (count)                   | 0.9213 $\pm$        | 0.8489 $\pm$        | 0.8504 $\pm$        | 0.1416 $\pm$        |
|                     | ccsmeth            | ccsmeth (count, $\Delta_p=0.33$ ) | 0.9313 $\pm$        | 0.8673 $\pm$        | 0.8593 $\pm$        | 0.1296 $\pm$        |
|                     | primrose           | pb-CpG-tools (model)              | 0.9354 $\pm$        | 0.8749 $\pm$        | 0.8739 $\pm$        | 0.1297 $\pm$        |
|                     | primrose           | ccsmeth (model)                   | 0.933 $\pm$         | 0.8705 $\pm$ 0.0001 | 0.8899 $\pm$        | 0.1301 $\pm$        |
|                     | ccsmeth            | ccsmeth (model)                   | 0.9453 $\pm$        | 0.8935 $\pm$        | 0.9022 $\pm$        | 0.121 $\pm$         |
| 25.6 $\times$ (all) | primrose           | pb-CpG-tools (count)              | 0.9077              | 0.8240              | 0.8383              | 0.1554              |
|                     | ccsmeth            | ccsmeth (count)                   | 0.9229              | 0.8518              | 0.8523              | 0.1404              |
|                     | ccsmeth            | ccsmeth (count, $\Delta_p=0.33$ ) | 0.9328              | 0.87                | 0.8612              | 0.1283              |
|                     | primrose           | pb-CpG-tools (model)              | 0.9371              | 0.8782              | 0.8764              | 0.1278              |
|                     | primrose           | ccsmeth (model)                   | 0.9342              | 0.8728              | 0.8913              | 0.1290              |
|                     | ccsmeth            | ccsmeth (model)                   | 0.9463              | 0.8955              | 0.9035              | 0.1201              |

**Supplementary Table 6** Evaluation of ccsmeth and primrose at genome-wide site level against **nanopore sequencing on HG002 (15Kb)** dataset. We compared CpGs covered by at least 5 reads in both CCS and nanopore datasets. For coverage  $5\times-25\times$ , we subsampled corresponding coverage reads from the total reads, and repeated the subsampling 5 times. Values in the table for coverage  $5\times-25\times$  are the average and standard deviation of 5 repeated tests in “average $\pm$ std” format.  $r$ : Pearson correlation;  $r^2$ : the coefficient of determination;  $\rho$ : Spearman correlation; RMSE: root mean square error.

| coverage            | method             |                                   | $r$                 | $r^2$               | $\rho$              | RMSE                |
|---------------------|--------------------|-----------------------------------|---------------------|---------------------|---------------------|---------------------|
|                     | read-level calling | site-level calling                |                     |                     |                     |                     |
| 5 $\times$          | primrose           | pb-CpG-tools (count)              | 0.798 $\pm$ 0.0003  | 0.6369 $\pm$ 0.0005 | 0.7378 $\pm$ 0.0004 | 0.2037 $\pm$ 0.0001 |
|                     | ccsmeth            | ccsmeth (count)                   | 0.8388 $\pm$ 0.0003 | 0.7037 $\pm$ 0.0005 | 0.7782 $\pm$ 0.0003 | 0.187 $\pm$ 0.0001  |
|                     | ccsmeth            | ccsmeth (count, $\Delta_p=0.33$ ) | 0.8505 $\pm$ 0.0003 | 0.7234 $\pm$ 0.0005 | 0.7875 $\pm$ 0.0003 | 0.1875 $\pm$ 0.0001 |
|                     | primrose           | pb-CpG-tools (model)              | 0.8248 $\pm$ 0.0003 | 0.6803 $\pm$ 0.0005 | 0.7662 $\pm$ 0.0003 | 0.2228 $\pm$ 0.0001 |
|                     | primrose           | ccsmeth (model)                   | 0.8626 $\pm$ 0.0003 | 0.7441 $\pm$ 0.0005 | 0.8135 $\pm$ 0.0002 | 0.1683 $\pm$ 0.0001 |
|                     | ccsmeth            | ccsmeth (model)                   | 0.8881 $\pm$ 0.0002 | 0.7887 $\pm$ 0.0004 | 0.8411 $\pm$ 0.0002 | 0.1554 $\pm$ 0.0001 |
| 10 $\times$         | primrose           | pb-CpG-tools (count)              | 0.8331 $\pm$ 0.0001 | 0.6941 $\pm$ 0.0001 | 0.7705 $\pm$ 0.0001 | 0.1845 $\pm$ 0      |
|                     | ccsmeth            | ccsmeth (count)                   | 0.8685 $\pm$ 0.0001 | 0.7543 $\pm$ 0.0001 | 0.8065 $\pm$ 0.0001 | 0.1674 $\pm$ 0      |
|                     | ccsmeth            | ccsmeth (count, $\Delta_p=0.33$ ) | 0.8795 $\pm$ 0.0001 | 0.7735 $\pm$ 0.0001 | 0.8139 $\pm$ 0.0001 | 0.1655 $\pm$ 0      |
|                     | primrose           | pb-CpG-tools (model)              | 0.8629 $\pm$ 0.0001 | 0.7446 $\pm$ 0.0001 | 0.7994 $\pm$ 0.0001 | 0.1952 $\pm$ 0      |
|                     | primrose           | ccsmeth (model)                   | 0.8835 $\pm$ 0.0001 | 0.7806 $\pm$ 0.0002 | 0.8332 $\pm$ 0.0001 | 0.1561 $\pm$ 0      |
|                     | ccsmeth            | ccsmeth (model)                   | 0.9062 $\pm$ 0.0001 | 0.8212 $\pm$ 0.0001 | 0.8583 $\pm$ 0.0001 | 0.1433 $\pm$ 0      |
| 15 $\times$         | primrose           | pb-CpG-tools (count)              | 0.8557 $\pm$ 0      | 0.7323 $\pm$ 0.0001 | 0.7928 $\pm$ 0.0001 | 0.1714 $\pm$ 0      |
|                     | ccsmeth            | ccsmeth (count)                   | 0.887 $\pm$ 0       | 0.7867 $\pm$ 0.0001 | 0.8262 $\pm$ 0      | 0.1541 $\pm$ 0      |
|                     | ccsmeth            | ccsmeth (count, $\Delta_p=0.33$ ) | 0.8971 $\pm$ 0      | 0.8049 $\pm$ 0.0001 | 0.833 $\pm$ 0       | 0.1508 $\pm$ 0      |
|                     | primrose           | pb-CpG-tools (model)              | 0.8847 $\pm$ 0      | 0.7828 $\pm$ 0.0001 | 0.8185 $\pm$ 0.0001 | 0.1761 $\pm$ 0      |
|                     | primrose           | ccsmeth (model)                   | 0.8959 $\pm$ 0      | 0.8026 $\pm$ 0.0001 | 0.8469 $\pm$ 0.0001 | 0.1477 $\pm$ 0      |
|                     | ccsmeth            | ccsmeth (model)                   | 0.9168 $\pm$ 0      | 0.8405 $\pm$ 0.0001 | 0.8704 $\pm$ 0.0001 | 0.1351 $\pm$ 0      |
| 20 $\times$         | primrose           | pb-CpG-tools (count)              | 0.8698 $\pm$ 0      | 0.7565 $\pm$ 0.0001 | 0.8075 $\pm$ 0.0001 | 0.1634 $\pm$ 0      |
|                     | ccsmeth            | ccsmeth (count)                   | 0.8984 $\pm$ 0      | 0.807 $\pm$ 0.0001  | 0.8393 $\pm$ 0.0001 | 0.1459 $\pm$ 0      |
|                     | ccsmeth            | ccsmeth (count, $\Delta_p=0.33$ ) | 0.9077 $\pm$ 0      | 0.824 $\pm$ 0.0001  | 0.8458 $\pm$ 0.0001 | 0.1417 $\pm$ 0      |
|                     | primrose           | pb-CpG-tools (model)              | 0.897 $\pm$ 0       | 0.8047 $\pm$ 0.0001 | 0.83 $\pm$ 0.0001   | 0.1641 $\pm$ 0      |
|                     | primrose           | ccsmeth (model)                   | 0.9037 $\pm$ 0      | 0.8166 $\pm$ 0.0001 | 0.856 $\pm$ 0.0001  | 0.1422 $\pm$ 0      |
|                     | ccsmeth            | ccsmeth (model)                   | 0.9233 $\pm$ 0      | 0.8525 $\pm$ 0.0001 | 0.8783 $\pm$ 0.0001 | 0.1298 $\pm$ 0      |
| 25 $\times$         | primrose           | pb-CpG-tools (count)              | 0.8794 $\pm$ 0      | 0.7733 $\pm$ 0.0001 | 0.8178 $\pm$ 0      | 0.1581 $\pm$ 0      |
|                     | ccsmeth            | ccsmeth (count)                   | 0.906 $\pm$ 0       | 0.8209 $\pm$ 0      | 0.8485 $\pm$ 0      | 0.1403 $\pm$ 0      |
|                     | ccsmeth            | ccsmeth (count, $\Delta_p=0.33$ ) | 0.9149 $\pm$ 0      | 0.837 $\pm$ 0       | 0.855 $\pm$ 0       | 0.1356 $\pm$ 0      |
|                     | primrose           | pb-CpG-tools (model)              | 0.9049 $\pm$ 0      | 0.8189 $\pm$ 0.0001 | 0.8395 $\pm$ 0      | 0.1561 $\pm$ 0      |
|                     | primrose           | ccsmeth (model)                   | 0.9091 $\pm$ 0      | 0.8264 $\pm$ 0.0001 | 0.8624 $\pm$ 0      | 0.1382 $\pm$ 0      |
|                     | ccsmeth            | ccsmeth (model)                   | 0.9278 $\pm$ 0      | 0.8608 $\pm$ 0      | 0.8839 $\pm$ 0      | 0.126 $\pm$ 0       |
| 25.6 $\times$ (all) | primrose           | pb-CpG-tools (count)              | 0.8813              | 0.7768              | 0.8200              | 0.1569              |
|                     | ccsmeth            | ccsmeth (count)                   | 0.9076              | 0.8238              | 0.8504              | 0.1391              |
|                     | ccsmeth            | ccsmeth (count, $\Delta_p=0.33$ ) | 0.9163              | 0.8396              | 0.8569              | 0.1343              |
|                     | primrose           | pb-CpG-tools (model)              | 0.9065              | 0.8218              | 0.8417              | 0.1545              |
|                     | primrose           | ccsmeth (model)                   | 0.9102              | 0.8284              | 0.8637              | 0.1373              |
|                     | ccsmeth            | ccsmeth (model)                   | 0.9287              | 0.8626              | 0.8850              | 0.1252              |

**Supplementary Table 7** Evaluation of ccsmeth and primrose at genome-wide site level against **BS-seq** on **HG002 (20Kb)** dataset. We compared CpGs covered by at least 5 reads in both CCS and BS-seq datasets. For coverage  $5 \times -15 \times$ , we subsampled corresponding coverage reads from the total reads, and repeated the subsampling 5 times. Values in the table for coverage  $5 \times -15 \times$  are the average and standard deviation of 5 repeated tests in “average $\pm$ std” format.  $r$ : Pearson correlation;  $r^2$ : the coefficient of determination;  $\rho$ : Spearman correlation; RMSE: root mean square error.

| coverage            | method             |                                   | $r$                 | $r^2$               | $\rho$              | RMSE                |
|---------------------|--------------------|-----------------------------------|---------------------|---------------------|---------------------|---------------------|
|                     | read-level calling | site-level calling                |                     |                     |                     |                     |
| 5 $\times$          | primrose           | pb-CpG-tools (count)              | 0.78 $\pm$ 0.0002   | 0.6084 $\pm$ 0.0004 | 0.706 $\pm$ 0.0004  | 0.2205 $\pm$ 0      |
|                     | ccsmeth            | ccsmeth (count)                   | 0.8253 $\pm$ 0.0003 | 0.6811 $\pm$ 0.0005 | 0.7449 $\pm$ 0.0005 | 0.2002 $\pm$ 0.0001 |
|                     | ccsmeth            | ccsmeth (count, $\Delta_p=0.33$ ) | 0.8378 $\pm$ 0.0003 | 0.7018 $\pm$ 0.0005 | 0.7548 $\pm$ 0.0005 | 0.1985 $\pm$ 0.0001 |
|                     | primrose           | pb-CpG-tools (model)              | 0.8165 $\pm$ 0.0002 | 0.6667 $\pm$ 0.0003 | 0.7425 $\pm$ 0.0003 | 0.2266 $\pm$ 0.0001 |
|                     | primrose           | ccsmeth (model)                   | 0.8406 $\pm$ 0.0003 | 0.7067 $\pm$ 0.0006 | 0.7806 $\pm$ 0.0005 | 0.1906 $\pm$ 0.0001 |
|                     | ccsmeth            | ccsmeth (model)                   | 0.8842 $\pm$ 0.0003 | 0.7817 $\pm$ 0.0005 | 0.8283 $\pm$ 0.0004 | 0.1636 $\pm$ 0.0001 |
| 10 $\times$         | primrose           | pb-CpG-tools (count)              | 0.8247 $\pm$ 0.0001 | 0.6802 $\pm$ 0.0002 | 0.7462 $\pm$ 0.0002 | 0.2008 $\pm$ 0      |
|                     | ccsmeth            | ccsmeth (count)                   | 0.8606 $\pm$ 0.0001 | 0.7407 $\pm$ 0.0001 | 0.7763 $\pm$ 0.0001 | 0.1805 $\pm$ 0      |
|                     | ccsmeth            | ccsmeth (count, $\Delta_p=0.33$ ) | 0.8733 $\pm$ 0.0001 | 0.7626 $\pm$ 0.0001 | 0.7852 $\pm$ 0.0001 | 0.1748 $\pm$ 0      |
|                     | primrose           | pb-CpG-tools (model)              | 0.8653 $\pm$ 0.0001 | 0.7487 $\pm$ 0.0001 | 0.7864 $\pm$ 0.0001 | 0.1931 $\pm$ 0.0001 |
|                     | primrose           | ccsmeth (model)                   | 0.8726 $\pm$ 0.0001 | 0.7614 $\pm$ 0.0002 | 0.8071 $\pm$ 0.0002 | 0.1748 $\pm$ 0.0001 |
|                     | ccsmeth            | ccsmeth (model)                   | 0.9083 $\pm$ 0.0001 | 0.8251 $\pm$ 0.0001 | 0.8499 $\pm$ 0.0001 | 0.1482 $\pm$ 0.0001 |
| 15 $\times$         | primrose           | pb-CpG-tools (count)              | 0.8549 $\pm$ 0      | 0.7308 $\pm$ 0.0001 | 0.775 $\pm$ 0.0001  | 0.1866 $\pm$ 0      |
|                     | ccsmeth            | ccsmeth (count)                   | 0.8829 $\pm$ 0      | 0.7794 $\pm$ 0      | 0.7989 $\pm$ 0.0001 | 0.1667 $\pm$ 0      |
|                     | ccsmeth            | ccsmeth (count, $\Delta_p=0.33$ ) | 0.895 $\pm$ 0       | 0.8011 $\pm$ 0      | 0.8075 $\pm$ 0.0001 | 0.1584 $\pm$ 0      |
|                     | primrose           | pb-CpG-tools (model)              | 0.8947 $\pm$ 0      | 0.8004 $\pm$ 0      | 0.8163 $\pm$ 0.0001 | 0.1686 $\pm$ 0      |
|                     | primrose           | ccsmeth (model)                   | 0.8924 $\pm$ 0.0001 | 0.7964 $\pm$ 0.0001 | 0.8263 $\pm$ 0.0001 | 0.1629 $\pm$ 0.0001 |
|                     | ccsmeth            | ccsmeth (model)                   | 0.9224 $\pm$ 0      | 0.8509 $\pm$ 0      | 0.8653 $\pm$ 0.0001 | 0.1372 $\pm$ 0      |
| 17.0 $\times$ (all) | primrose           | pb-CpG-tools (count)              | 0.8648              | 0.7479              | 0.7849              | 0.1819              |
|                     | ccsmeth            | ccsmeth (count)                   | 0.8900              | 0.7922              | 0.8066              | 0.1622              |
|                     | ccsmeth            | ccsmeth (count, $\Delta_p=0.33$ ) | 0.9019              | 0.8134              | 0.8152              | 0.1531              |
|                     | primrose           | pb-CpG-tools (model)              | 0.9038              | 0.8168              | 0.8265              | 0.1603              |
|                     | primrose           | ccsmeth (model)                   | 0.8991              | 0.8084              | 0.8334              | 0.1586              |
|                     | ccsmeth            | ccsmeth (model)                   | 0.9271              | 0.8594              | 0.8707              | 0.1333              |

**Supplementary Table 8** Evaluation of ccsmeth and primrose at genome-wide site level against **nanopore sequencing** on **HG002 (20Kb)** dataset. We compared CpGs covered by at least 5 reads in both CCS and nanopore datasets. For coverage 5×-15×, we subsampled corresponding coverage reads from the total reads, and repeated the subsampling 5 times. Values in the table for coverage 5×-15× are the average and standard deviation of 5 repeated tests in “average±std” format.  $r$ : Pearson correlation;  $r^2$ : the coefficient of determination;  $\rho$ : Spearman correlation; RMSE: root mean square error.

| coverage   | method             |                                   | $r$           | $r^2$         | $\rho$        | RMSE          |
|------------|--------------------|-----------------------------------|---------------|---------------|---------------|---------------|
|            | read-level calling | site-level calling                |               |               |               |               |
| 5×         | primrose           | pb-CpG-tools (count)              | 0.7647±0.0003 | 0.5847±0.0004 | 0.7019±0.0004 | 0.2159±0      |
|            | ccsmeth            | ccsmeth (count)                   | 0.8192±0.0003 | 0.6711±0.0004 | 0.7554±0.0004 | 0.195±0.0001  |
|            | ccsmeth            | ccsmeth (count, $\Delta_p=0.33$ ) | 0.8306±0.0003 | 0.6898±0.0004 | 0.7636±0.0004 | 0.1981±0.0001 |
|            | primrose           | pb-CpG-tools (model)              | 0.7967±0.0003 | 0.6348±0.0004 | 0.733±0.0004  | 0.2376±0.0001 |
|            | primrose           | ccsmeth (model)                   | 0.8262±0.0004 | 0.6827±0.0006 | 0.7691±0.0006 | 0.1861±0.0001 |
|            | ccsmeth            | ccsmeth (model)                   | 0.8749±0.0003 | 0.7655±0.0005 | 0.8242±0.0003 | 0.1608±0.0001 |
| 10×        | primrose           | pb-CpG-tools (count)              | 0.8061±0.0001 | 0.6498±0.0002 | 0.7389±0.0001 | 0.1968±0.0001 |
|            | ccsmeth            | ccsmeth (count)                   | 0.8522±0.0001 | 0.7263±0.0001 | 0.7851±0.0001 | 0.1759±0      |
|            | ccsmeth            | ccsmeth (count, $\Delta_p=0.33$ ) | 0.8635±0.0001 | 0.7457±0.0002 | 0.7916±0.0001 | 0.1757±0.0001 |
|            | primrose           | pb-CpG-tools (model)              | 0.8422±0.0001 | 0.7092±0.0002 | 0.77±0.0001   | 0.2078±0.0001 |
|            | primrose           | ccsmeth (model)                   | 0.8549±0.0002 | 0.7308±0.0003 | 0.792±0.0002  | 0.1725±0.0001 |
|            | ccsmeth            | ccsmeth (model)                   | 0.8967±0.0001 | 0.804±0.0002  | 0.8424±0.0001 | 0.1481±0.0001 |
| 15×        | primrose           | pb-CpG-tools (count)              | 0.8327±0.0001 | 0.6934±0.0001 | 0.7645±0.0001 | 0.1834±0      |
|            | ccsmeth            | ccsmeth (count)                   | 0.8723±0.0001 | 0.7608±0.0001 | 0.8061±0.0001 | 0.1628±0      |
|            | ccsmeth            | ccsmeth (count, $\Delta_p=0.33$ ) | 0.883±0.0001  | 0.7798±0.0001 | 0.8122±0.0001 | 0.1608±0      |
|            | primrose           | pb-CpG-tools (model)              | 0.8679±0.0001 | 0.7532±0.0001 | 0.7929±0.0001 | 0.1873±0      |
|            | primrose           | ccsmeth (model)                   | 0.8718±0.0001 | 0.76±0.0001   | 0.8087±0.0001 | 0.1627±0      |
|            | ccsmeth            | ccsmeth (model)                   | 0.9087±0      | 0.8258±0.0001 | 0.8555±0.0001 | 0.1395±0      |
| 17.0×(all) | primrose           | pb-CpG-tools (count)              | 0.8416        | 0.7084        | 0.7735        | 0.1789        |
|            | ccsmeth            | ccsmeth (count)                   | 0.8788        | 0.7724        | 0.8135        | 0.1584        |
|            | ccsmeth            | ccsmeth (count, $\Delta_p=0.33$ ) | 0.8893        | 0.7909        | 0.8196        | 0.1559        |
|            | primrose           | pb-CpG-tools (model)              | 0.8758        | 0.7671        | 0.8008        | 0.1804        |
|            | primrose           | ccsmeth (model)                   | 0.8776        | 0.7701        | 0.8152        | 0.1591        |
|            | ccsmeth            | ccsmeth (model)                   | 0.9127        | 0.8330        | 0.8602        | 0.1365        |

**Supplementary Table 9** Evaluation of ccsmeth and primrose at genome-wide site level against **BS-seq** on **HG002 (24Kb)** dataset. We compared CpGs covered by at least 5 reads in both CCS and BS-seq datasets. For coverage  $5 \times -25 \times$ , we subsampled corresponding coverage reads from the total reads, and repeated the subsampling 5 times. Values in the table for coverage  $5 \times -25 \times$  are the average and standard deviation of 5 repeated tests in “average $\pm$ std” format.  $r$ : Pearson correlation;  $r^2$ : the coefficient of determination;  $\rho$ : Spearman correlation; RMSE: root mean square error.

| coverage            | method             |                                   | $r$                 | $r^2$               | $\rho$              | RMSE                |
|---------------------|--------------------|-----------------------------------|---------------------|---------------------|---------------------|---------------------|
|                     | read-level calling | site-level calling                |                     |                     |                     |                     |
| 5 $\times$          | primrose           | pb-CpG-tools (count)              | 0.7818 $\pm$ 0.0001 | 0.6112 $\pm$ 0.0002 | 0.7156 $\pm$ 0.0003 | 0.2217 $\pm$ 0      |
|                     | ccsmeth            | ccsmeth (count)                   | 0.8249 $\pm$ 0.0001 | 0.6805 $\pm$ 0.0002 | 0.7524 $\pm$ 0.0003 | 0.2026 $\pm$ 0.0001 |
|                     | ccsmeth            | ccsmeth (count, $\Delta_p=0.33$ ) | 0.8395 $\pm$ 0.0001 | 0.7047 $\pm$ 0.0002 | 0.7631 $\pm$ 0.0004 | 0.1985 $\pm$ 0.0001 |
|                     | primrose           | pb-CpG-tools (model)              | 0.8247 $\pm$ 0.0001 | 0.6801 $\pm$ 0.0002 | 0.7571 $\pm$ 0.0003 | 0.2221 $\pm$ 0.0001 |
|                     | primrose           | ccsmeth (model)                   | 0.8586 $\pm$ 0.0002 | 0.7372 $\pm$ 0.0003 | 0.8097 $\pm$ 0.0003 | 0.181 $\pm$ 0.0001  |
|                     | ccsmeth            | ccsmeth (model)                   | 0.8864 $\pm$ 0.0002 | 0.7857 $\pm$ 0.0003 | 0.836 $\pm$ 0.0003  | 0.1645 $\pm$ 0.0001 |
| 10 $\times$         | primrose           | pb-CpG-tools (count)              | 0.8246 $\pm$ 0      | 0.6799 $\pm$ 0.0001 | 0.757 $\pm$ 0.0001  | 0.2017 $\pm$ 0      |
|                     | ccsmeth            | ccsmeth (count)                   | 0.8605 $\pm$ 0.0001 | 0.7404 $\pm$ 0.0001 | 0.7873 $\pm$ 0.0001 | 0.1822 $\pm$ 0      |
|                     | ccsmeth            | ccsmeth (count, $\Delta_p=0.33$ ) | 0.8753 $\pm$ 0.0001 | 0.7661 $\pm$ 0.0002 | 0.797 $\pm$ 0.0001  | 0.1734 $\pm$ 0      |
|                     | primrose           | pb-CpG-tools (model)              | 0.8696 $\pm$ 0.0001 | 0.7562 $\pm$ 0.0001 | 0.8006 $\pm$ 0.0001 | 0.1898 $\pm$ 0      |
|                     | primrose           | ccsmeth (model)                   | 0.8846 $\pm$ 0.0001 | 0.7826 $\pm$ 0.0002 | 0.8363 $\pm$ 0.0002 | 0.166 $\pm$ 0.0001  |
|                     | ccsmeth            | ccsmeth (model)                   | 0.9087 $\pm$ 0.0001 | 0.8257 $\pm$ 0.0002 | 0.8591 $\pm$ 0.0002 | 0.1494 $\pm$ 0.0001 |
| 15 $\times$         | primrose           | pb-CpG-tools (count)              | 0.8545 $\pm$ 0      | 0.7301 $\pm$ 0.0001 | 0.7862 $\pm$ 0      | 0.1877 $\pm$ 0      |
|                     | ccsmeth            | ccsmeth (count)                   | 0.8841 $\pm$ 0.0001 | 0.7817 $\pm$ 0.0001 | 0.8118 $\pm$ 0      | 0.1682 $\pm$ 0      |
|                     | ccsmeth            | ccsmeth (count, $\Delta_p=0.33$ ) | 0.8984 $\pm$ 0.0001 | 0.8072 $\pm$ 0.0001 | 0.8213 $\pm$ 0.0001 | 0.1562 $\pm$ 0      |
|                     | primrose           | pb-CpG-tools (model)              | 0.8983 $\pm$ 0.0001 | 0.807 $\pm$ 0.0001  | 0.8298 $\pm$ 0.0001 | 0.1652 $\pm$ 0      |
|                     | primrose           | ccsmeth (model)                   | 0.9017 $\pm$ 0.0001 | 0.8131 $\pm$ 0.0001 | 0.8546 $\pm$ 0.0001 | 0.1546 $\pm$ 0.0001 |
|                     | ccsmeth            | ccsmeth (model)                   | 0.923 $\pm$ 0.0001  | 0.8519 $\pm$ 0.0002 | 0.8749 $\pm$ 0.0001 | 0.1381 $\pm$ 0.0001 |
| 20 $\times$         | primrose           | pb-CpG-tools (count)              | 0.8729 $\pm$ 0      | 0.762 $\pm$ 0.0001  | 0.8047 $\pm$ 0      | 0.1793 $\pm$ 0      |
|                     | ccsmeth            | ccsmeth (count)                   | 0.8985 $\pm$ 0      | 0.8073 $\pm$ 0.0001 | 0.8273 $\pm$ 0.0001 | 0.1597 $\pm$ 0      |
|                     | ccsmeth            | ccsmeth (count, $\Delta_p=0.33$ ) | 0.9121 $\pm$ 0      | 0.8319 $\pm$ 0.0001 | 0.8369 $\pm$ 0.0001 | 0.1457 $\pm$ 0      |
|                     | primrose           | pb-CpG-tools (model)              | 0.9148 $\pm$ 0      | 0.8368 $\pm$ 0.0001 | 0.8479 $\pm$ 0.0001 | 0.1496 $\pm$ 0      |
|                     | primrose           | ccsmeth (model)                   | 0.9124 $\pm$ 0.0001 | 0.8324 $\pm$ 0.0001 | 0.8664 $\pm$ 0.0001 | 0.1468 $\pm$ 0      |
|                     | ccsmeth            | ccsmeth (model)                   | 0.9318 $\pm$ 0      | 0.8682 $\pm$ 0      | 0.885 $\pm$ 0       | 0.1305 $\pm$ 0      |
| 25 $\times$         | primrose           | pb-CpG-tools (count)              | 0.8851 $\pm$ 0      | 0.7834 $\pm$ 0      | 0.817 $\pm$ 0       | 0.1738 $\pm$ 0      |
|                     | ccsmeth            | ccsmeth (count)                   | 0.9078 $\pm$ 0      | 0.8241 $\pm$ 0.0001 | 0.8377 $\pm$ 0      | 0.1541 $\pm$ 0      |
|                     | ccsmeth            | ccsmeth (count, $\Delta_p=0.33$ ) | 0.9208 $\pm$ 0      | 0.8478 $\pm$ 0.0001 | 0.8474 $\pm$ 0      | 0.1389 $\pm$ 0      |
|                     | primrose           | pb-CpG-tools (model)              | 0.925 $\pm$ 0       | 0.8556 $\pm$ 0      | 0.8608 $\pm$ 0      | 0.1394 $\pm$ 0      |
|                     | primrose           | ccsmeth (model)                   | 0.9194 $\pm$ 0.0001 | 0.8453 $\pm$ 0.0001 | 0.8745 $\pm$ 0.0001 | 0.1413 $\pm$ 0      |
|                     | ccsmeth            | ccsmeth (model)                   | 0.9376 $\pm$ 0      | 0.879 $\pm$ 0.0001  | 0.8918 $\pm$ 0.0001 | 0.1252 $\pm$ 0      |
| 28.4 $\times$ (all) | primrose           | pb-CpG-tools (count)              | 0.8923              | 0.7962              | 0.8244              | 0.1705              |
|                     | ccsmeth            | ccsmeth (count)                   | 0.9132              | 0.8340              | 0.8439              | 0.1508              |
|                     | ccsmeth            | ccsmeth (count, $\Delta_p=0.33$ ) | 0.9259              | 0.8572              | 0.8538              | 0.1348              |
|                     | primrose           | pb-CpG-tools (model)              | 0.9309              | 0.8666              | 0.8692              | 0.1333              |
|                     | primrose           | ccsmeth (model)                   | 0.9237              | 0.8532              | 0.8794              | 0.1378              |
|                     | ccsmeth            | ccsmeth (model)                   | 0.9410              | 0.8855              | 0.8960              | 0.1220              |

**Supplementary Table 10** Evaluation of *ccsmeth* and *primrose* at genome-wide site level against **nanopore sequencing** on **HG002 (24Kb)** dataset. We compared CpGs covered by at least 5 reads in both CCS and nanopore datasets. For coverage  $5\times$ - $25\times$ , we subsampled corresponding coverage reads from the total reads, and repeated the subsampling 5 times. Values in the table for coverage  $5\times$ - $25\times$  are the average and standard deviation of 5 repeated tests in “average $\pm$ std” format.  $r$ : Pearson correlation;  $r^2$ : the coefficient of determination;  $\rho$ : Spearman correlation; RMSE: root mean square error.

| coverage            | method             |                                   | $r$                 | $r^2$               | $\rho$              | RMSE                |
|---------------------|--------------------|-----------------------------------|---------------------|---------------------|---------------------|---------------------|
|                     | read-level calling | site-level calling                |                     |                     |                     |                     |
| 5 $\times$          | primrose           | pb-CpG-tools (count)              | 0.766 $\pm$ 0.0002  | 0.5868 $\pm$ 0.0003 | 0.709 $\pm$ 0.0004  | 0.2163 $\pm$ 0.0001 |
|                     | ccsmeth            | ccsmeth (count)                   | 0.8165 $\pm$ 0.0002 | 0.6667 $\pm$ 0.0003 | 0.7575 $\pm$ 0.0003 | 0.1964 $\pm$ 0.0001 |
|                     | ccsmeth            | ccsmeth (count, $\Delta_p=0.33$ ) | 0.8299 $\pm$ 0.0002 | 0.6888 $\pm$ 0.0004 | 0.7668 $\pm$ 0.0003 | 0.1975 $\pm$ 0.0001 |
|                     | primrose           | pb-CpG-tools (model)              | 0.8042 $\pm$ 0.0002 | 0.6467 $\pm$ 0.0003 | 0.7456 $\pm$ 0.0003 | 0.2341 $\pm$ 0.0001 |
|                     | primrose           | ccsmeth (model)                   | 0.8432 $\pm$ 0.0002 | 0.711 $\pm$ 0.0003  | 0.7932 $\pm$ 0.0003 | 0.1782 $\pm$ 0.0001 |
|                     | ccsmeth            | ccsmeth (model)                   | 0.8752 $\pm$ 0.0002 | 0.7659 $\pm$ 0.0004 | 0.8267 $\pm$ 0.0002 | 0.1616 $\pm$ 0.0001 |
| 10 $\times$         | primrose           | pb-CpG-tools (count)              | 0.8058 $\pm$ 0.0001 | 0.6493 $\pm$ 0.0001 | 0.7472 $\pm$ 0.0001 | 0.1969 $\pm$ 0      |
|                     | ccsmeth            | ccsmeth (count)                   | 0.8501 $\pm$ 0.0001 | 0.7226 $\pm$ 0.0002 | 0.7904 $\pm$ 0.0001 | 0.1765 $\pm$ 0.0001 |
|                     | ccsmeth            | ccsmeth (count, $\Delta_p=0.33$ ) | 0.8635 $\pm$ 0.0001 | 0.7457 $\pm$ 0.0002 | 0.7981 $\pm$ 0.0001 | 0.1738 $\pm$ 0.0001 |
|                     | primrose           | pb-CpG-tools (model)              | 0.8462 $\pm$ 0.0001 | 0.7161 $\pm$ 0.0002 | 0.7823 $\pm$ 0.0001 | 0.2054 $\pm$ 0      |
|                     | primrose           | ccsmeth (model)                   | 0.8663 $\pm$ 0.0001 | 0.7504 $\pm$ 0.0001 | 0.8157 $\pm$ 0.0001 | 0.1659 $\pm$ 0      |
|                     | ccsmeth            | ccsmeth (model)                   | 0.8952 $\pm$ 0.0001 | 0.8014 $\pm$ 0.0001 | 0.8461 $\pm$ 0.0001 | 0.1491 $\pm$ 0      |
| 15 $\times$         | primrose           | pb-CpG-tools (count)              | 0.8324 $\pm$ 0.0001 | 0.6928 $\pm$ 0.0002 | 0.7731 $\pm$ 0.0001 | 0.1836 $\pm$ 0.0001 |
|                     | ccsmeth            | ccsmeth (count)                   | 0.8717 $\pm$ 0.0001 | 0.7598 $\pm$ 0.0002 | 0.8132 $\pm$ 0.0001 | 0.1628 $\pm$ 0.0001 |
|                     | ccsmeth            | ccsmeth (count, $\Delta_p=0.33$ ) | 0.8846 $\pm$ 0.0001 | 0.7824 $\pm$ 0.0002 | 0.8205 $\pm$ 0.0001 | 0.1578 $\pm$ 0.0001 |
|                     | primrose           | pb-CpG-tools (model)              | 0.8715 $\pm$ 0.0001 | 0.7595 $\pm$ 0.0002 | 0.8043 $\pm$ 0.0001 | 0.1849 $\pm$ 0.0001 |
|                     | primrose           | ccsmeth (model)                   | 0.8807 $\pm$ 0.0001 | 0.7756 $\pm$ 0.0002 | 0.8313 $\pm$ 0.0001 | 0.1571 $\pm$ 0.0001 |
|                     | ccsmeth            | ccsmeth (model)                   | 0.9076 $\pm$ 0.0001 | 0.8237 $\pm$ 0.0001 | 0.8596 $\pm$ 0.0001 | 0.1403 $\pm$ 0.0001 |
| 20 $\times$         | primrose           | pb-CpG-tools (count)              | 0.8492 $\pm$ 0      | 0.7211 $\pm$ 0.0001 | 0.79 $\pm$ 0        | 0.1754 $\pm$ 0      |
|                     | ccsmeth            | ccsmeth (count)                   | 0.8852 $\pm$ 0      | 0.7836 $\pm$ 0      | 0.828 $\pm$ 0       | 0.1543 $\pm$ 0      |
|                     | ccsmeth            | ccsmeth (count, $\Delta_p=0.33$ ) | 0.8973 $\pm$ 0      | 0.8052 $\pm$ 0      | 0.8353 $\pm$ 0      | 0.1478 $\pm$ 0      |
|                     | primrose           | pb-CpG-tools (model)              | 0.8862 $\pm$ 0      | 0.7853 $\pm$ 0      | 0.8183 $\pm$ 0      | 0.1718 $\pm$ 0      |
|                     | primrose           | ccsmeth (model)                   | 0.89 $\pm$ 0        | 0.792 $\pm$ 0       | 0.8417 $\pm$ 0      | 0.1511 $\pm$ 0      |
|                     | ccsmeth            | ccsmeth (model)                   | 0.9154 $\pm$ 0      | 0.838 $\pm$ 0       | 0.8684 $\pm$ 0      | 0.1343 $\pm$ 0      |
| 25 $\times$         | primrose           | pb-CpG-tools (count)              | 0.8605 $\pm$ 0.0001 | 0.7405 $\pm$ 0.0001 | 0.8015 $\pm$ 0.0001 | 0.17 $\pm$ 0        |
|                     | ccsmeth            | ccsmeth (count)                   | 0.8942 $\pm$ 0      | 0.7996 $\pm$ 0.0001 | 0.8382 $\pm$ 0.0001 | 0.1486 $\pm$ 0      |
|                     | ccsmeth            | ccsmeth (count, $\Delta_p=0.33$ ) | 0.9057 $\pm$ 0      | 0.8204 $\pm$ 0.0001 | 0.8456 $\pm$ 0.0001 | 0.1412 $\pm$ 0      |
|                     | primrose           | pb-CpG-tools (model)              | 0.8955 $\pm$ 0.0001 | 0.802 $\pm$ 0.0001  | 0.8293 $\pm$ 0.0001 | 0.1631 $\pm$ 0      |
|                     | primrose           | ccsmeth (model)                   | 0.8963 $\pm$ 0      | 0.8033 $\pm$ 0.0001 | 0.8488 $\pm$ 0.0001 | 0.1469 $\pm$ 0      |
|                     | ccsmeth            | ccsmeth (model)                   | 0.9207 $\pm$ 0      | 0.8477 $\pm$ 0.0001 | 0.8744 $\pm$ 0.0001 | 0.1301 $\pm$ 0      |
| 28.4 $\times$ (all) | primrose           | pb-CpG-tools (count)              | 0.8674              | 0.7524              | 0.8086              | 0.1668              |
|                     | ccsmeth            | ccsmeth (count)                   | 0.8996              | 0.8093              | 0.8445              | 0.1452              |
|                     | ccsmeth            | ccsmeth (count, $\Delta_p=0.33$ ) | 0.9108              | 0.8295              | 0.8520              | 0.1372              |
|                     | primrose           | pb-CpG-tools (model)              | 0.9011              | 0.8119              | 0.8370              | 0.1579              |
|                     | primrose           | ccsmeth (model)                   | 0.9002              | 0.8103              | 0.8532              | 0.1442              |
|                     | ccsmeth            | ccsmeth (model)                   | 0.9240              | 0.8537              | 0.8781              | 0.1275              |

**Supplementary Table 11** Evaluation of ccsmeth and primrose at genome-wide site level against **BS-seq** on **SD0651\_P1 (15Kb)** dataset. We compared CpGs covered by at least 5 reads in both CCS and BS-seq datasets. For coverage 5×-15×, we subsampled corresponding coverage reads from the total reads, and repeated the subsampling 5 times. Values in the table for coverage 5×-15× are the average and standard deviation of 5 repeated tests in “average±std” format.  $r$ : Pearson correlation;  $r^2$ : the coefficient of determination;  $\rho$ : Spearman correlation; RMSE: root mean square error.

| coverage   | method             |                                   | $r$           | $r^2$         | $\rho$        | RMSE          |
|------------|--------------------|-----------------------------------|---------------|---------------|---------------|---------------|
|            | read-level calling | site-level calling                |               |               |               |               |
| 5×         | primrose           | pb-CpG-tools (count)              | 0.667±0.0007  | 0.4449±0.0009 | 0.3993±0.0005 | 0.2279±0      |
|            | ccsmeth            | ccsmeth (count)                   | 0.716±0.0007  | 0.5127±0.0009 | 0.4463±0.0006 | 0.2095±0      |
|            | ccsmeth            | ccsmeth (count, $\Delta_p=0.33$ ) | 0.7367±0.0006 | 0.5427±0.0009 | 0.4581±0.0006 | 0.1992±0      |
|            | primrose           | pb-CpG-tools (model)              | 0.7738±0.0006 | 0.5988±0.001  | 0.4598±0.0007 | 0.1772±0.0001 |
|            | primrose           | ccsmeth (model)                   | 0.7528±0.0006 | 0.5667±0.001  | 0.4372±0.0006 | 0.1897±0      |
|            | ccsmeth            | ccsmeth (model)                   | 0.8233±0.0005 | 0.6778±0.0008 | 0.5012±0.0006 | 0.1554±0      |
| 10×        | primrose           | pb-CpG-tools (count)              | 0.7218±0.0002 | 0.521±0.0003  | 0.4305±0.0001 | 0.2095±0      |
|            | ccsmeth            | ccsmeth (count)                   | 0.7633±0.0002 | 0.5826±0.0003 | 0.4742±0.0002 | 0.1913±0      |
|            | ccsmeth            | ccsmeth (count, $\Delta_p=0.33$ ) | 0.7849±0.0002 | 0.6161±0.0003 | 0.4831±0.0002 | 0.1775±0      |
|            | primrose           | pb-CpG-tools (model)              | 0.8213±0.0002 | 0.6745±0.0003 | 0.4807±0.0002 | 0.1568±0      |
|            | primrose           | ccsmeth (model)                   | 0.7873±0.0002 | 0.6198±0.0004 | 0.4551±0.0001 | 0.1781±0.0001 |
|            | ccsmeth            | ccsmeth (model)                   | 0.8506±0.0002 | 0.7235±0.0004 | 0.521±0.0002  | 0.1437±0.0001 |
| 15×        | primrose           | pb-CpG-tools (count)              | 0.7598±0.0001 | 0.5773±0.0001 | 0.4542±0.0001 | 0.1969±0      |
|            | ccsmeth            | ccsmeth (count)                   | 0.794±0.0001  | 0.6304±0.0001 | 0.4964±0      | 0.1792±0      |
|            | ccsmeth            | ccsmeth (count, $\Delta_p=0.33$ ) | 0.815±0.0001  | 0.6643±0.0001 | 0.5042±0.0001 | 0.1632±0      |
|            | primrose           | pb-CpG-tools (model)              | 0.8501±0      | 0.7226±0.0001 | 0.493±0.0001  | 0.1416±0      |
|            | primrose           | ccsmeth (model)                   | 0.809±0.0001  | 0.6544±0.0002 | 0.4688±0.0002 | 0.1691±0.0001 |
|            | ccsmeth            | ccsmeth (model)                   | 0.8653±0.0001 | 0.7488±0.0001 | 0.5358±0      | 0.1359±0      |
| 19.6×(all) | primrose           | pb-CpG-tools (count)              | 0.7839        | 0.6146        | 0.4707        | 0.1893        |
|            | ccsmeth            | ccsmeth (count)                   | 0.8128        | 0.6607        | 0.5117        | 0.1720        |
|            | ccsmeth            | ccsmeth (count, $\Delta_p=0.33$ ) | 0.8329        | 0.6937        | 0.5197        | 0.1548        |
|            | primrose           | pb-CpG-tools (model)              | 0.8702        | 0.7572        | 0.5093        | 0.1274        |
|            | primrose           | ccsmeth (model)                   | 0.8239        | 0.6788        | 0.4800        | 0.1624        |
|            | ccsmeth            | ccsmeth (model)                   | 0.8750        | 0.7656        | 0.5461        | 0.1303        |



**Supplementary Table 12** Evaluation of ccsmeth and primrose at genome-wide site level against **nanopore sequencing** on **CHM13 (20Kb)** dataset. We compared CpGs covered by at least 5 reads in both CCS and nanopore datasets. For coverage 5×-15×, we subsampled corresponding coverage reads from the total reads, and repeated the subsampling 5 times. Values in the table for coverage 5×-15× are the average and standard deviation of 5 repeated tests in “average±std” format.  $r$ : Pearson correlation;  $r^2$ : the coefficient of determination;  $\rho$ : Spearman correlation; RMSE: root mean square error.

| coverage   | method             |                                   | $r$           | $r^2$         | $\rho$        | RMSE          |
|------------|--------------------|-----------------------------------|---------------|---------------|---------------|---------------|
|            | read-level calling | site-level calling                |               |               |               |               |
| 5×         | primrose           | pb-CpG-tools (count)              | 0.7941±0.0001 | 0.6305±0.0002 | 0.7621±0.0004 | 0.2192±0      |
|            | ccsmeth            | ccsmeth (count)                   | 0.8359±0.0002 | 0.6987±0.0003 | 0.8124±0.0003 | 0.2±0.0001    |
|            | ccsmeth            | ccsmeth (count, $\Delta_p=0.33$ ) | 0.849±0.0002  | 0.7208±0.0003 | 0.8206±0.0003 | 0.2013±0.0001 |
|            | primrose           | pb-CpG-tools (model)              | 0.8332±0.0002 | 0.6943±0.0003 | 0.8029±0.0003 | 0.2334±0.0001 |
|            | primrose           | ccsmeth (model)                   | 0.8698±0.0001 | 0.7566±0.0002 | 0.8248±0.0003 | 0.1759±0.0001 |
|            | ccsmeth            | ccsmeth (model)                   | 0.8989±0.0001 | 0.808±0.0002  | 0.8643±0.0002 | 0.1587±0.0001 |
| 10×        | primrose           | pb-CpG-tools (count)              | 0.8357±0.0001 | 0.6984±0.0001 | 0.8032±0.0001 | 0.1967±0      |
|            | ccsmeth            | ccsmeth (count)                   | 0.8692±0.0001 | 0.7556±0.0002 | 0.8456±0.0002 | 0.1779±0.0001 |
|            | ccsmeth            | ccsmeth (count, $\Delta_p=0.33$ ) | 0.8816±0.0001 | 0.7772±0.0001 | 0.8521±0.0001 | 0.1756±0      |
|            | primrose           | pb-CpG-tools (model)              | 0.8787±0.0001 | 0.7721±0.0001 | 0.8427±0.0001 | 0.1966±0      |
|            | primrose           | ccsmeth (model)                   | 0.8939±0.0001 | 0.7991±0.0001 | 0.8479±0.0001 | 0.1608±0      |
|            | ccsmeth            | ccsmeth (model)                   | 0.9181±0.9181 | 0.843±0.843   | 0.8848±0.8848 | 0.1448±0.1448 |
| 15×        | primrose           | pb-CpG-tools (count)              | 0.8639±0      | 0.7462±0      | 0.8286±0      | 0.181±0       |
|            | ccsmeth            | ccsmeth (count)                   | 0.8911±0      | 0.794±0       | 0.8667±0      | 0.1622±0      |
|            | ccsmeth            | ccsmeth (count, $\Delta_p=0.33$ ) | 0.9024±0      | 0.8143±0.0001 | 0.8724±0.0001 | 0.1575±0      |
|            | primrose           | pb-CpG-tools (model)              | 0.905±0       | 0.8191±0.0001 | 0.864±0       | 0.1714±0      |
|            | primrose           | ccsmeth (model)                   | 0.9087±0      | 0.8257±0      | 0.8605±0      | 0.1499±0      |
|            | ccsmeth            | ccsmeth (model)                   | 0.9299±0      | 0.8647±0      | 0.8962±0      | 0.135±0       |
| 16.5×(all) | primrose           | pb-CpG-tools (count)              | 0.8711        | 0.7589        | 0.8350        | 0.1770        |
|            | ccsmeth            | ccsmeth (count)                   | 0.8966        | 0.8039        | 0.8720        | 0.1582        |
|            | ccsmeth            | ccsmeth (count, $\Delta_p=0.33$ ) | 0.9075        | 0.8236        | 0.8775        | 0.1529        |
|            | primrose           | pb-CpG-tools (model)              | 0.9112        | 0.8303        | 0.8688        | 0.1650        |
|            | primrose           | ccsmeth (model)                   | 0.9124        | 0.8325        | 0.8636        | 0.1469        |
|            | ccsmeth            | ccsmeth (model)                   | 0.9328        | 0.8701        | 0.8990        | 0.1324        |

**Supplementary Table 13** Comparing CCS with BS-seq and nanopore sequencing on predicting site-level methylation frequencies of HG002 haplotypes phased by Illumina trio data. CpGs in haplotypes of autosomes were used for evaluation.  $r$ : Pearson correlation;  $r^2$ : the coefficient of determination;  $\rho$ : Spearman correlation; RMSE: root mean square error; ONT: nanopore sequencing.

| benchmark | haplotype | $r$    | $r^2$  | $\rho$ | RMSE   |
|-----------|-----------|--------|--------|--------|--------|
| BS-seq    | maternal  | 0.9321 | 0.8689 | 0.8505 | 0.1366 |
|           | paternal  | 0.9322 | 0.8689 | 0.8507 | 0.1365 |
| ONT       | maternal  | 0.9403 | 0.8842 | 0.8623 | 0.1215 |
|           | paternal  | 0.9404 | 0.8844 | 0.8625 | 0.1214 |

**Supplementary Table 14** The number of CpGs in autosomes and sex chromosomes detected by using difference coverage of HG002 CCS reads. Values for 5×-70× are the average and standard deviation of 5 repeated tests in “average±std” format.

| sample | data_type | coverage | number of CpGs      |
|--------|-----------|----------|---------------------|
| HG002  | CCS       | 5        | 16355322.6±32213.69 |
| HG002  | CCS       | 10       | 29168678.8±13633.79 |
| HG002  | CCS       | 15       | 31331716±6140.61    |
| HG002  | CCS       | 20       | 31907365.2±2354.58  |
| HG002  | CCS       | 25       | 32152455.2±5660.62  |
| HG002  | CCS       | 30       | 32295541.2±4856.94  |
| HG002  | CCS       | 35       | 32392385±4284.79    |
| HG002  | CCS       | 40       | 32464914.6±3946.71  |
| HG002  | CCS       | 45       | 32525561±2717.7     |
| HG002  | CCS       | 50       | 32577563.6±1736.5   |
| HG002  | CCS       | 55       | 32621611.4±1994.63  |
| HG002  | CCS       | 60       | 32658534.6±2874.86  |
| HG002  | CCS       | 65       | 32691926.6±1646.07  |
| HG002  | CCS       | 70       | 32721946.4±1213.63  |
| HG002  | CCS       | 71.0     | 32737721            |

**Supplementary Table 15** The number of CpGs in autosomes phased by using difference coverage of HG002 CCS reads. Values for 5×-70× are the average and standard deviation of 5 repeated tests in “average±std” format.

| sample | data_type | coverage | number of CpGs      |
|--------|-----------|----------|---------------------|
| HG002  | CCS       | 5        | 16355322.6±32213.69 |
| HG002  | CCS       | 10       | 29168678.8±13633.79 |
| HG002  | CCS       | 15       | 31331716±6140.61    |
| HG002  | CCS       | 20       | 31907365.2±2354.58  |
| HG002  | CCS       | 25       | 32152455.2±5660.62  |
| HG002  | CCS       | 30       | 32295541.2±4856.94  |
| HG002  | CCS       | 35       | 32392385±4284.79    |
| HG002  | CCS       | 40       | 32464914.6±3946.71  |
| HG002  | CCS       | 45       | 32525561±2717.7     |
| HG002  | CCS       | 50       | 32577563.6±1736.5   |
| HG002  | CCS       | 55       | 32621611.4±1994.63  |
| HG002  | CCS       | 60       | 32658534.6±2874.86  |
| HG002  | CCS       | 65       | 32691926.6±1646.07  |
| HG002  | CCS       | 70       | 32721946.4±1213.63  |
| HG002  | CCS       | 71.0     | 32737721            |

**Supplementary Table 16** Comparing CCS (ccsmeth) with BS-seq (Bismark) and nanopore sequencing (DeepSignal2) on predicting site-level methylation frequencies in repetitive genomic regions using HG002 data.  $r$ : Pearson correlation;  $r^2$ : the coefficient of determination;  $\rho$ : Spearman correlation; RMSE: root mean square error; ONT: nanopore sequencing; RepeatMasker: repetitive genomic elements annotated by RepeatMasker; SDs: segmental duplications; cenSats: peri/centromeric satellites.

| region       | benchmark | $r$    | $r^2$  | $\rho$ | RMSE   |
|--------------|-----------|--------|--------|--------|--------|
| RepeatMasker | BS-seq    | 0.9540 | 0.9101 | 0.9102 | 0.1055 |
|              | ONT       | 0.9358 | 0.8758 | 0.8902 | 0.1138 |
| SDs          | BS-seq    | 0.9208 | 0.8479 | 0.8770 | 0.1370 |
|              | ONT       | 0.9087 | 0.8257 | 0.8791 | 0.1308 |
| cenSats      | BS-seq    | 0.8822 | 0.7783 | 0.8462 | 0.1584 |
|              | ONT       | 0.8572 | 0.7349 | 0.8327 | 0.1606 |

**Supplementary Table 17** Comparing CCS (ccsmeth) with BS-seq (Bismark) and nanopore sequencing (DeepSignal2) on predicting site-level methylation frequencies in repetitive genomic regions of HG002 haplotypes phased by Illumina trio data.  $r$ : Pearson correlation;  $r^2$ : the coefficient of determination;  $\rho$ : Spearman correlation; RMSE: root mean square error; ONT: nanopore sequencing; RepeatMasker: repetitive genomic elements annotated by RepeatMasker; SDs: segmental duplications; cenSats: peri/centromeric satellites.

| region       | benchmark | haplotype | $r$    | $r^2$  | $\rho$ | RMSE   |
|--------------|-----------|-----------|--------|--------|--------|--------|
| RepeatMasker | BS-seq    | maternal  | 0.9283 | 0.8617 | 0.8429 | 0.1370 |
|              |           | paternal  | 0.9285 | 0.8621 | 0.8432 | 0.1369 |
|              | ONT       | maternal  | 0.9365 | 0.8771 | 0.8546 | 0.1221 |
|              |           | paternal  | 0.9368 | 0.8775 | 0.8550 | 0.1218 |
| SDs          | BS-seq    | maternal  | 0.9053 | 0.8196 | 0.8332 | 0.1558 |
|              |           | paternal  | 0.9007 | 0.8113 | 0.8311 | 0.1599 |
|              | ONT       | maternal  | 0.9175 | 0.8419 | 0.8490 | 0.1377 |
|              |           | paternal  | 0.9160 | 0.8390 | 0.8520 | 0.1389 |
| cenSats      | BS-seq    | maternal  | 0.8907 | 0.7933 | 0.8340 | 0.1633 |
|              |           | paternal  | 0.8925 | 0.7966 | 0.8378 | 0.1628 |
|              | ONT       | maternal  | 0.9023 | 0.8141 | 0.8553 | 0.1489 |
|              |           | paternal  | 0.9066 | 0.8219 | 0.8612 | 0.1458 |

**Supplementary Table 18** Runtime (wall clock time) and peak memory usage for the main steps of HK model, primrose, and ccsmeth on processing **subsampling 100K ZMW reads** of HG002 15Kb, 20Kb, and 24Kb. Note that we only evaluate the steps for per-read methylation calling and the preprocessing steps since HK model does not support calculating site-level methylation frequency.

| method   | step               | No. of<br>CPU cores | No. of<br>GPUs | runtime (h:mm:ss or m:ss)/peak memory (GB) |               |               |
|----------|--------------------|---------------------|----------------|--------------------------------------------|---------------|---------------|
|          |                    |                     |                | HG002 (15Kb)                               | HG002 (20Kb)  | HG002 (24Kb)  |
| HK model | Align              | 40                  | -              | 14:08/58.94                                | 9:14/54.69    | 13:52/60.77   |
|          | Extract features   | 1                   | -              | 18:12:43/6.61                              | 13:10:45/6.33 | 19:16:50/6.68 |
|          | Format matrix      | 1                   | -              | 24:09/18.99                                | 23:24/16.64   | 29:34/23.56   |
|          | Predict            | 1                   | 1              | 2:36/21.20                                 | 1:31/18.80    | 2:07/25.95    |
| primrose | Call CCS (pbccs)   | 40                  | -              | 22:41/4.46                                 | 18:33/4.81    | 21:10/5.41    |
|          | Align (pbmm2)      | 40                  | -              | 1:20/25.29                                 | 1:18/25.12    | 1:26/26.09    |
|          | Call modifications | 40                  | -              | 0:08/0.42                                  | 0:07/0.46     | 0:10/0.54     |
| ccsmeth  | Call CCS (pbccs)   | 40                  | -              | 22:41/4.46                                 | 18:33/4.81    | 21:10/5.41    |
|          | Align (pbmm2)      | 40                  | -              | 1:20/25.29                                 | 1:18/25.12    | 1:26/26.09    |
|          | Call modifications | 40                  | 1              | 5:57/2.44                                  | 4:24/2.47     | 6:42/2.56     |

**Supplementary Table 19** Runtime (wall clock time) and peak memory usage for the main steps of primrose and ccsmeth on processing **1 SMRT cell reads** of HG002 15Kb, 20Kb, and 24Kb (cell ID: m64008\_201124\_002822 of HG002 15Kb, m64011\_190901\_095311 of HG002 20Kb, and m64014\_200920\_132517 of HG002 24Kb).

| method       | step                          | No. of<br>CPU cores | No. of<br>GPUs | runtime (h:mm:ss or m:ss)/peak memory (GB) |               |               |               |
|--------------|-------------------------------|---------------------|----------------|--------------------------------------------|---------------|---------------|---------------|
|              |                               |                     |                | HG002 (15Kb)                               | HG002 (20Kb)  | HG002 (24Kb)  |               |
| primrose/    | Call CCS (pbccs)              | 40                  | -              | 40:39:40/6.01                              | 27:29:36/4.96 | 46:27:22/6.31 |               |
| pb-cpg-tools | Align (pbmm2)                 | 40                  | -              | 58:18/65.54                                | 37:40/65.26   | 1:13:07/68.64 |               |
|              | Call per-read methylation     | 40                  | -              | 8:55/1.22                                  | 5:45/1.25     | 10:24/1.56    |               |
|              | Call methylation<br>frequency | count-mode          | 40             | -                                          | 1:15:58/21.23 | 1:12:52/20.90 | 1:18:55/21.33 |
|              |                               | model-mode          | 40             | -                                          | 52:55/15.64   | 50:47/14.66   | 57:36/15.83   |
| ccsmeth      | Call CCS (pbccs)              | 40                  | -              | 40:39:40/6.01                              | 27:29:36/4.96 | 46:27:22/6.31 |               |
|              | Align (pbmm2)                 | 40                  | -              | 58:18/65.54                                | 37:40/65.26   | 1:13:07/68.64 |               |
|              | Call per-read methylation     | 40                  | 1              | 4:53:40/30.44                              | 3:11:12/30.39 | 5:48:11/30.41 |               |
|              | Call methylation<br>frequency | count-mode          | 40             | -                                          | 15:12/18.58   | 12:10/18.46   | 17:19/18.59   |
|              |                               | model-mode          | 40             | -                                          | 55:36/18.58   | 45:29/18.46   | 59:18/18.59   |

**Supplementary Table 20** Computing resources used for evaluating the runtime of the processes in ccsmethphase.

| process                        | server     | No. of CPU cores | No. of GPU cards |
|--------------------------------|------------|------------------|------------------|
| <i>SAMTOOLS_index_bam</i>      | Server-CPU | 40               | -                |
| <i>CCSMETH_call_mods</i>       | Server-GPU | 40               | 2                |
| <i>PBMM2</i>                   | Server-CPU | 40               | -                |
| <i>SAMTOOLS_merge_bam</i>      | Server-CPU | 40               | -                |
| <i>CLAIR3</i>                  | Server-CPU | 40               | -                |
| <i>WHATSHAP_phase_haplotag</i> | Server-CPU | 10               | -                |
| <i>CCSMETH_call_freq</i>       | Server-CPU | 40               | -                |
| <i>DSS</i>                     | Server-CPU | 40               | -                |

## Supplementary Notes

### Supplementary Note 1 Evaluation of csmeth for 5mCpG detection at read level in different genomic contexts and regions

Different genomic regions may vary in sequence contexts and methylation levels<sup>8</sup>. To explore whether the performance of csmeth is correlated with any genomic features, we further examine csmeth for read-level 5mCpG detection in different genomic contexts and regions using the datasets of HG002 and SD0651\_P1.

We consider the following genomic contexts and regions: (1) Singletons and non-singletons. A CpG is called singleton if there are no other CpGs in the up and down 10 bp regions. Otherwise, it is called non-singleton. (2) Genic and intergenic regions. We examine three genic regions, including promoters, exons, and introns. For exons and introns, we extract corresponding regions from the gene annotation file of CHM13 v2.0. We extend the regions of transcription start sites (TSS) 2000 bp up and 200 bp down as promoters. Then, we take regions which are not included in exons, introns, and promoters as intergenic regions. (3) CpG islands, shores, and shelves. We download the CpG islands annotations of CHM13 v2.0. We take the regions located 2000 bp up and down from CpG islands as CpG shores. Then we take regions located 2000 bp up and down from CpG shores as CpG shelves. (4) Repetitive regions. Based on the RepeatMasker annotations of CHM13 v2.0, we examined five categories of repetitive regions: Simple repeats, short interspersed nuclear elements (SINE), long interspersed nuclear element (LINE), long terminal repeat (LTR), and others (All repetitive regions other than simple repeats, SINE, LINE, LTR are taken as “others”).

We use the high-confidence methylated and unmethylated CpGs of HG002 and SD0651\_P1 for the read-level evaluation (Supplementary Fig. 3a). As shown in Supplementary Fig. 3b, compared to the genome-wide performance, csmeth has much higher accuracies in non-singletons and CpG islands but has lower accuracies in singletons, indicating that csmeth tends to have higher performances in regions with high CpG densities. csmeth has relative lower accuracies in intergenic regions, CpG shores, and CpG shelves. In simple repeats and “Others” repetitive regions, csmeth has lower sensitivities and specificities, respectively. On all four datasets, the results of primrose show consistent patterns with csmeth across all tested regions. The results indicate that biologically relevant genomic contexts and regions do impact the performance of 5mCpG detection. Further studies are needed to focus on improving the performance of 5mCpG detection in specific genomic regions.

### Supplementary Note 2 Comparison of the count mode and model mode of csmeth

We use the HG002 CCS datasets (71.0×) to compare the methylation frequencies calculated by the count mode and model mode of csmeth:

Suppose  $R_b$ ,  $R_c$ ,  $R_m$  are the methylation frequencies of a CpG calculated by BS-seq, count mode of csmeth, and model mode of csmeth, respectively. We use  $|R_b - R_c| - |R_b - R_m|$  to measure whether  $R_c$  or  $R_m$  is closer to  $R_b$ . If  $|R_b - R_c| - |R_b - R_m| > 0.1$ , meaning the model mode has a more accurate prediction than count mode, we classify the CpG into the group  $G_m$ . If  $|R_b - R_c| - |R_b - R_m| < -0.1$ , we classify the CpG into the group  $G_c$ . We find that among the total tested 29,174,320 CpGs, 3,975,014 CpGs are classified to  $G_m$ , while 644,370 CpGs are classified to  $G_c$  (Supplementary Fig. 7a). The methylation frequencies of CpGs in the two groups show significant differences: CpGs in  $G_m$  tend to have either very low ( $<0.2$ ) or high ( $>0.8$ ) methylation frequencies, while CpGs in  $G_c$  tend to have intermediate methylation frequencies (Supplementary Fig. 7b). The comparison of genome-wide per-site methylation frequency between the count mode and model mode of csmeth is shown in Supplementary Fig. 7c.

### Supplementary Note 3 Pipeline for haplotype-aware methylation calling using Illumina whole-genome sequencing (WGS) trio data and BS-seq data

To evaluate the methylation phasing pipeline on CCS data, we performed haplotype-aware methylation calling using WGS and BS-seq reads of HG002 as the benchmark (Supplementary Fig. 8). In this pipeline, we used SNPsplit (version 0.5.0)<sup>9</sup> to assign BS-seq reads to the haplotypes of HG002. SNPsplit requires information of heterozygous SNVs of HG002 and the origin of these SNVs for accurate reads alignment and splitting. Thus, we downloaded the Illumina WGS reads of AshkenazimTrio: HG003 is the father, HG004 is the mother, HG002 is the son. We used BWA-MEM (version 0.7.17-r1194-dirty)<sup>10</sup> to align the WGS reads, and then used DeepTrio<sup>11</sup> (version 1.3.0) to call SNVs for HG002, HG003, and HG004. Then, we used the following rules as in NanoMethPhase<sup>12</sup> to phase heterozygous SNVs in autosomes of HG002:

$$\begin{cases} \text{Haplotype}(S) = 1, & \text{if } S \in \text{maternal SNVs and } S \notin \text{paternal SNVs and } S \in \text{child's heterozygous SNVs} \\ \text{Haplotype}(S) = 1, & \text{else if } S \in \text{maternal homozygous SNVs and } S \notin \text{paternal homozygous SNVs and } S \in \text{child's heterozygous SNVs} \\ \text{Haplotype}(S) = 2, & \text{else if } S \notin \text{maternal SNVs and } S \in \text{paternal SNVs and } S \in \text{child's heterozygous SNVs} \\ \text{Haplotype}(S) = 2, & \text{else if } S \notin \text{maternal homozygous SNVs and } S \in \text{paternal homozygous SNVs and } S \in \text{child's heterozygous SNVs} \end{cases} \quad (1)$$

where  $S$  represents an SNV. After phasing, we generated a chromosome-level SNV phasing result (*i.e.*, all heterozygous SNVs of HG002 inherited from HG004 (mother) were assigned to Haplotype 1, and all heterozygous SNVs inherited from HG003 (father) were assigned to Haplotype 2).

We used Bismark<sup>13</sup> to align BS-seq reads to genome reference. Then, we used SNPsplit to assign the aligned BS-seq reads to haplotypes. We got the methylation profile of each haplotype using Bismark. At last, we got differentially methylated regions (DMRs) of the two haplotypes using DSS (version 2.44.0)<sup>14</sup> (Supplementary Fig. 8).

### Supplementary Note 4 Pipeline for haplotype-aware methylation calling using nanopore data

The pipeline for haplotype-aware methylation calling using nanopore data is similar to the pipeline using PacBio data (Supplementary Fig. 9). In this pipeline, we used Guppy (version 4.2.2+effbaf8) to basecall nanopore raw reads. We then used Tombo<sup>15</sup> (version 1.5.1) to re-squiggle the raw signals in nanopore reads to the reference genome, and then used DeepSignal2 (v0.1.2, <https://github.com/PengNi/deepsignal2>)<sup>16</sup> to call 5mCpGs. We used Clair3<sup>17</sup> (v0.1-r11 minor 2) with “r941\_prom\_hac\_g360+g422” model to call variants. The called “PASS” SNVs were then used by WhatsHap<sup>18</sup> (version 1.4) to assign the reads to two haplotypes. After generating phased methylation profiles by DeepSignal2, we used DSS (version 2.44.0)<sup>14</sup> to get DMRs.

### Supplementary Note 5 The model architecture of ccsmeth

#### (1) bidirectional GRU

A bidirectional GRU<sup>19</sup> layer includes a forward GRU and a backward GRU to catch both the forward and reverse flow of features. Suppose  $x_1, x_2, \dots, x_t$  are a sequence of features, each time step  $x_i$  contains four features: the nucleotide base, the mean IPD value, the mean PW value, and the number of subreads. A GRU cell will recursively calculate the hidden layer  $h$  as follows:

$$r_t = \text{sigmoid}(W_r[h_{t-1}, x_t] + b_r) \quad (2)$$

$$z_t = \text{sigmoid}(W_z[h_{t-1}, x_t] + b_z) \quad (3)$$

$$\hat{h}_t = \tanh(W_h \cdot [r_t h_{t-1}, x_t] + b_h) \quad (4)$$

$$h_t = (1 - z_t)h_{t-1} + z_t \hat{h}_t \quad (5)$$

where  $W$  and  $b$  are weight matrices and biases.  $x_t$  is the input feature;  $r_t$  is a reset gate;  $z_t$  is an update gate;  $h_t$  is the hidden state; and  $\hat{h}_t$  represents information that needs to be updated in the current cell. The outputs of

forward and backward GRU are combined as:

$$h_{t,A} = h_{t,F} \oplus h_{t,B} \quad (6)$$

(2) Bahdanau attention

Bahdanau attention<sup>20</sup> receives all the hidden states of RNN cells and outputs context vector  $c_t$  as follows:

$$\text{score}(h_t, h_s) = \tanh(W_1 h_t + W_2 h_s) \quad (7)$$

$$a_{ts} = \text{softmax}(\text{score}(h_t, h_s)) \quad (8)$$

$$c_t = a_{ts} h_t^T \quad (9)$$

where  $h_t$  represents the hidden state in the output vector of BiGRU;  $h_s$  contains the final hidden state for an element in the sequence from GRU;  $W_1$  and  $W_2$  are weight matrices.

(3) Softmax activation function to output methylated/unmethylated probabilities

A softmax activation layer is used in csmeth to predict the methylated and unmethylated probabilities of one sample as follows:

$$\text{softmax}(x_i) = \frac{e^{x_i}}{\sum_{j=0}^1 e^{x_j}}, i = 0 \text{ or } 1 \quad (10)$$

where  $x_0$  and  $x_1$  are two outputs from the former fully connected layer, for calculating unmethylated and methylated probabilities, respectively.

(4) The cross-entropy loss function used for training the read-level model is as follows:

$$L_{CE} = z * -\log(y) + (1 - z) * -\log(1 - y) \quad (11)$$

where  $z$  is the true label vector and  $y$  is the predicted methylated probability vector from the softmax function.

(5) The mean squared error (MSE) loss function for training the site-level model is as follows:

$$L_{MSE} = \frac{\sum_{i=0}^n (x_i^2 - y_i^2)}{n} \quad (12)$$

where  $x_i$  is the predicted methylation frequency,  $y_i$  is the true methylation frequency,  $n$  is the number of samples.

### Supplementary Note 6 Testing csmethphase using CCS data of the HN0641 family trio

We sequenced three human samples of a Chinese family trio using CCS, and got 2 SMRT cells of CCS reads for each of the three samples: HN0641\_FA (father), HN0641\_MO (mother), HN0641\_S1 (son). We tested csmethphase using the CCS reads of the family trio. As shown in Supplementary Fig. 15a, the results indicate that the three samples have similar methylation levels. 11.9%, 12.0%, 10.4% CpGs of HN0641\_FA, HN0641\_MO, HN0641\_S1, respectively, have low ( $\leq 0.3$ ) methylation frequencies, while 75.4%, 73.4%, 80.6% CpGs of the three samples, respectively, have high ( $\geq 0.7$ ) methylation frequencies.

We then examined the haplotype-aware methylation status of known imprinted regions in HN0641\_S1. As shown in Supplementary Fig. 15b, the well-characterized imprinted intervals show large methylation differences between the two haplotypes (median=0.51). 14.0% of other known imprinted intervals also show large ( $> 0.5$ ) methylation differences. The result of HN0641\_S1 is consistent with the results in HG002 and SD0651\_P1.

Using csmethphase, we generated 2,813 DMRs from the CCS data of HN0641\_S1. The DMRs cover 108 (52.9%) of the known imprinted intervals (*i.e.*, 108 known imprinted intervals are overlapped with the CCS-generated DMRs) (Supplementary Fig. 15c). Moreover, the haplotype phasing results of the family trio show that csmethphase not only can detect imprinted intervals, but also reveals the pattern of parental imprinting correctly. In the results of csmethphase, the maternally imprinted intervals (*e.g.*, *GNAS\_Ext1A* and *PEG10*) in HN0641\_S1 show high methylation levels in the haplotype inherited from mother, while the paternally imprinted intervals (*e.g.*, *MEG3*) show high methylation levels in the haplotype inherited from father (Supplementary Figs. 16-18).



### Supplementary Note 7 Computational efficiency of ccsmeth and the ccsmethphase pipeline

We compared the runtime (wall clock time) and peak memory of ccsmeth with HK model and primrose. The comparison was performed at an HPC cluster containing two kinds of servers: (1) Server-CPU with 48 CPU cores (Intel(R) Xeon(R) Gold 6248R CPU @ 3.0GHz) and 192 GB RAM; (2) Server-GPU with 40 CPU cores (Intel(R) Xeon(R) Gold 6248 CPU @ 2.50GHz), 384 GB RAM, and 2 Nvidia Tesla V100 GPU cards. As shown in Supplementary Fig. 22, ccsmeth and primrose (+pb\_CpG\_tools) contain the same steps for methylation calling, while HK model has a different pipeline. The differences are mainly in the following aspects: (1) HK model extracts features from subreads, while ccsmeth and primrose take CCS reads as input. (2) HK model needs aligned reads for feature extraction, while the “*Call per-read methylation*” step of ccsmeth and primrose can be performed before or after the “*Align*” step. (3) There is no module or script in HK model for calculating site-level methylation frequency.

We first subsampled 100K ZMW reads from each of the three HG002 CCS datasets (15Kb, 20Kb, 24Kb) to compare all three methods. As shown in Supplementary Table 18, HK model is very time-consuming, especially in the “*Extract features*” step. This is mainly because HK model directly extracts features from subreads, and the script of HK model for “*Extract features*” is not optimized for parallel processing. We further used 1 SMRT cell CCS reads from each of the three HG002 datasets to compare primrose and ccsmeth (Supplementary Table 19). As shown in Supplementary Tables 18-19, primrose is extremely fast in calling per-read methylation. primrose takes ~6-10 minutes to call per-read methylation from 1 SMRT cell of CCS data, while ccsmeth needs ~3-6 hours. However, when CCS reads have been called from the raw subreads, the whole pipeline of ccsmeth takes at most 8 hours to call methylation from 1 SMRT cell CCS data. Compared to primrose which takes at most ~2.4 hours, ccsmeth can also be used in practice. In the future, we will continue to optimize ccsmeth in terms of computational efficiency.

We also evaluated the runtime of 8 main processes in the ccsmethphase pipeline: *SAMTOOLS\_index\_bam* for indexing the CCS bam files, *CCSMETH\_call\_mods* for calling methylation in CCS reads, *PBMM2* for aligning CCS reads to the reference genome, *SAMTOOLS\_merge\_bam* for merging alignment bam files of the same “sample”, *CLAIR3* for calling SNVs, *WHATSHAP\_phase\_haplotag* for phasing SNVs and reads, *CCSMETH\_call\_freq* for calling methylation frequencies of CpGs, and *DSS* for calling DMRs. The data used for evaluation include 10 SMRT cells of CCS reads used for testing in this study, in which there are 2 SMRT cells of CCS reads for each of the 5 “samples”: HG002 (15Kb), HG002 (20Kb), HG002 (24Kb), CHM13 (20Kb), and SD0651\_P1 (15Kb) (Supplementary Table 2). Details of the applied computing resources for the processes are shown in Supplementary Table 20. The runtime of the processes is shown in Supplementary Fig. 23. Note that for the first 3 processes, the runtime for each SMRT cell is shown. For the last 5 processes, the runtime for each “sample” (2 SMRT cells) is shown. The evaluation indicates that for a human sample with 2 SMRT cells of CCS reads, methylation phasing and ASM detection can be performed in less than 14 hours using ccsmethphase even on a single server (Supplementary Fig. 23).

## Supplementary References

- 1 Robinson, J. T. *et al.* Integrative genomics viewer. *Nature Biotechnology* **29**, 24-26, doi:10.1038/nbt.1754 (2011).
- 2 Tse, O. O. *et al.* Genome-wide detection of cytosine methylation by single molecule real-time sequencing. *Proceedings of the National Academy of Sciences* **118** (2021).
- 3 Human Pangenome Reference Consortium. *HG002\_Data\_Freeze\_v1.0*. (Human Pangenome Reference Consortium, accessed October 2022) [https://github.com/human-pangenomics/HG002\\_Data\\_Freeze\\_v1.0](https://github.com/human-pangenomics/HG002_Data_Freeze_v1.0).
- 4 Baid, G. *et al.* DeepConsensus improves the accuracy of sequences with a gap-aware sequence transformer. *Nature Biotechnology* (2022).
- 5 Nurk, S. *et al.* The complete sequence of a human genome. *Science* **376**, 44-53 (2022).
- 6 Oxford Nanopore Technologies. *ONT Open Datasets*. (Oxford Nanopore Technologies, accessed October 2022) <https://labs.epi2me.io/dataindex/>.
- 7 Zook, J. M. *et al.* Extensive sequencing of seven human genomes to characterize benchmark reference materials. *Scientific Data* **3**, 160025 (2016).
- 8 Liu, Y. *et al.* DNA methylation-calling tools for Oxford Nanopore sequencing: a survey and human epigenome-wide evaluation. *Genome Biology* **22**, 295 (2021).
- 9 Krueger, F. & Andrews, S. SNPsplit: Allele-specific splitting of alignments between genomes with known SNP genotypes [version 2; peer review: 3 approved]. *F1000Research* **5** (2016).
- 10 Li, H. Aligning sequence reads, clone sequences and assembly contigs with BWA-MEM. *arXiv preprint arXiv:1303.3997* (2013).
- 11 Kolesnikov, A. *et al.* DeepTrio: Variant Calling in Families Using Deep Learning. *bioRxiv*, 2021.2004.2005.438434 (2021).
- 12 Akbari, V. *et al.* Megabase-scale methylation phasing using nanopore long reads and NanoMethPhase. *Genome Biology* **22**, 68 (2021).
- 13 Krueger, F. & Andrews, S. R. Bismark: a flexible aligner and methylation caller for Bisulfite-Seq applications. *Bioinformatics* **27**, 1571-1572 (2011).
- 14 Park, Y. & Wu, H. Differential methylation analysis for BS-seq data under general experimental design. *Bioinformatics* **32**, 1446-1453 (2016).
- 15 Stoiber, M. *et al.* De novo Identification of DNA Modifications Enabled by Genome-Guided Nanopore Signal Processing. *bioRxiv*, 094672 (2017).
- 16 Ni, P. *et al.* DeepSignal: detecting DNA methylation state from Nanopore sequencing reads using deep-learning. *Bioinformatics* **35**, 4586-4595 (2019).
- 17 Zheng, Z. *et al.* Symphonizing pileup and full-alignment for deep learning-based long-read variant calling. *bioRxiv*, 2021.2012.2029.474431 (2021).
- 18 Martin, M. *et al.* WhatsHap: fast and accurate read-based phasing. *bioRxiv*, 085050 (2016).
- 19 Chung, J., Gulcehre, C., Cho, K. & Bengio, Y. Empirical evaluation of gated recurrent neural networks on sequence modeling. *arXiv preprint arXiv:1412.3555* (2014).
- 20 Bahdanau, D., Cho, K. & Bengio, Y. Neural machine translation by jointly learning to align and translate. *arXiv preprint arXiv:1409.0473* (2014).
