# Supplementary material for: DNA 5-methylcytosine detection and methylation phasing using PacBio circular consensus sequencing
Source: PubMed Central journal article supplement (PMC10329642; doi:10.1038/s41467-023-39784-9), 2023-07-08
Supplement: 41467_2023_39784_MOESM3_ESM.pdf [file 41467_2023_39784_MOESM3_ESM.pdf]

## Description of additional supplementary files

File Name: **Supplementary Data 1**

Description: Comparing ccsmeth and primrose/pb-CpG-tools against BS-seq and nanopore sequencing under different coverages of HG002 CCS reads (71.0× in total). Values for coverage 5×-70× are the average and standard deviation of 5 repeated tests in “average ± std” format.  $r$ : Pearson correlation;  $r^2$ : the coefficient of determination;  $\rho$ : Spearman correlation; RMSE: root mean square error.
